1 **The Long Pentraxin 3 (PTX3) Suppresses Immunity to Cutaneous Leishmaniasis**  
2 **by Negatively Regulating Th17 Response**

3

4 Gaurav Gupta<sup>1</sup>, Ping Jia<sup>1</sup>, Rohit Sharma<sup>2</sup>, Romaniya Zayats<sup>1</sup>, Sayonara M. Viana<sup>1,2</sup>, Lianyu  
5 Shan<sup>1</sup>, Zhriiong Mou<sup>1</sup>, Aldina Barral<sup>2</sup>, Viviane S. Boaventura<sup>2</sup>, Thomas T. Murooka<sup>1</sup>, Abdel  
6 Soussi-Gounni<sup>1</sup>, Camila I. de Oliveira<sup>2</sup> and Jude E. Uzonna<sup>1\*</sup>.

7

8 <sup>1</sup> Faculty of Health Sciences, Department of Immunology, College of Medicine, University  
9 of Manitoba, Winnipeg, MB, Canada.

10 <sup>2</sup> Instituto Gonçalo Muniz (IGM), FIOCRUZ, Salvador, Brazil.

11

12 **\*Corresponding Author:**

13 Jude E Uzonna, DVM, Ph.D.

14 Professor and Associate Head (Immunology)

15

16 **Present address:**

17 Rady Faculty of Medicine

18 University of Manitoba

19 750 McDermot Avenue,

20 460 Apotex Centre,

21 Winnipeg, Manitoba,

22 R3E 0T5

23

24 **Email:** jude.uzonna@umanitoba.ca

25

26

27 **Abstract:**

28 The long Pentraxin 3 (PTX3), a soluble pattern recognition molecule, plays a critical role  
29 in inflammation, tissue repair and wound healing. Here, we show that PTX3 regulates  
30 disease pathogenesis in cutaneous leishmaniasis (CL). PTX3 expression is increased in  
31 active skin lesions in patients and mice during CL, with higher levels being expressed in  
32 individuals with severe disease. PTX3 deficient (PTX3<sup>-/-</sup>) mice were highly resistant to *L.*  
33 *major* infection and the enhanced resistance was associated with increased IL-17  
34 response. Neutralization of IL-17A abolished this enhanced resistance while treatment  
35 with recombinant PTX3 resulted in reduced IL-17A response and increased susceptibility  
36 to *L. major* infection. Naïve CD4<sup>+</sup> T cells from PTX3<sup>-/-</sup> mice displayed increased  
37 differentiation into Th17 cells, which was reversed in the presence of recombinant PTX3.  
38 The enhanced Th17 response observed in PTX3<sup>-/-</sup> cells was associated with increased  
39 *Leishmania* specific IL-6 production from dendritic cells along with enhanced expression  
40 of Th17-specific transcription factors including ROR $\gamma$ t, AhR and STAT3. Addition of  
41 recombinant PTX3 significantly inhibited the expression of Th17-specific transcription  
42 factors and dramatically reduced the frequency of Th17 cells in Th17-polarizing cultures  
43 of PTX3<sup>-/-</sup> CD4<sup>+</sup> T cells. Collectively, our results show that PTX3 contributes to the  
44 pathogenesis of CL by suppressing Th17 differentiation and IL-17A production.

45

46 **Author Summary:**

47 Cutaneous leishmaniasis (CL) is caused by several species of *Leishmania*. Currently,  
48 there is no approved vaccine against human CL because of the poor understanding of  
49 the mechanisms that regulate disease pathogenesis and correlates of protective  
50 immunity. Because the long pentraxin 3 (PTX3, a soluble pattern recognition molecule  
51 that forms an integral part of the host innate immunity), regulates inflammation and

52 tissue repair, which are critical physiological events associated with resolution of skin  
53 lesions during CL, we investigated its role in disease pathogenesis.  
54 Here, we show that PTX3 levels were elevated in skin-lesions in patients and mice  
55 during CL. Using a loss of function approach, we showed that PTX3 contributes to  
56 pathogenesis, and this was associated with increased IL-17A responses. Neutralization  
57 and recombinant cytokine treatment studies showed that the increased resistance of  
58 PTX3 deficient mice to *L. major* is due to enhanced Th17 response in these mice. We  
59 further show that PTX3 negatively regulates IL-6 production by dendritic cells and the  
60 expression of IL-17A-specific transcription factors (including ROR $\gamma$ T, STAT3, IRF4,  
61 BATF and AhR) in CD4<sup>+</sup> T cells. Collectively, these findings show that PTX3 is a  
62 negative regulator of Th17 response and protective immunity during *L. major* infection.

64 **Introduction:**

65

66 Cutaneous leishmaniasis (CL) is caused by several species of protozoan parasites that  
67 belong to the genus *Leishmania*. The disease is endemic to Middle East, Asia, Latin and  
68 Central America and North Africa (1). Resistance to CL is usually associated with the  
69 development of strong IFN- $\gamma$ -producing CD4<sup>+</sup> Th1 cells, which activate macrophages to  
70 produce nitric oxide (NO), an effector molecule for killing intracellular parasites (2-5). In  
71 contrast, susceptibility has been associated with IL-4 and IL-10 production by Th2 cells,  
72 which are cytokines that deactivate macrophages and inhibit their ability to kill  
73 intracellular parasites (2, 6). Besides Th1 and Th2 cells, IL-17A-secreting Th17 cells  
74 have also been shown to mediate either host protection (7-10) or susceptibility (11-13) to  
75 leishmaniasis. However, the series of events that leads to the induction of Th17  
76 responses in CL are unknown. Our group recently showed that Th17 activation and IL-  
77 17A production during allergic asthma was regulated in part by the long Pentraxin 3  
78 (PTX3) (14), a soluble pattern recognition molecule that forms an integral part of the host  
79 innate immunity (15, 16). Whether PTX3 also played a central role in regulating Th17  
80 responses during CL is unknown.

81 PTX3 is expressed by both immune and non-immune cells, such as myeloid  
82 dendritic cells (17, 18), neutrophils (19), macrophages (20), mononuclear phagocytes,  
83 endothelial cells (21), smooth muscle cells (22), epithelial cells (23, 24), fibroblasts (25),  
84 and adipocytes (26). PTX3 is involved in pathogen recognition (15, 27, 28) and plays an  
85 important protective role in bacterial (29, 30), fungal (15, 31) and viral (32, 33) infections  
86 by modulating the host inflammatory response. Interestingly, PTX3 is capable of  
87 promoting (34) as well as suppressing (35, 36) tissue damage due to excessive  
88 inflammation. In addition, PTX3 also participates in wound healing and tissue repair (37).

89 Given the well characterized roles of PTX3 in inflammation and tissue repair,  
90 which are critical physiological events associated with resolution of skin lesions during

91 CL, we investigated whether PTX played a protective or pathogenic role during CL. We  
92 show that PTX3 negatively regulates host immunity to *L. major* infection by suppressing  
93 Th17 differentiation and IL-17A production by CD4<sup>+</sup> T cells in infected mice.

94

95

96

97

98 **Results:**

99 **PTX3 negatively regulates the pathogenesis of cutaneous leishmaniasis.**

100 PTX3 has been shown to regulate immunity against a wide range of pathogens (15, 30,  
101 31) and to participate in wound healing and tissue repair (37) by modulating the host  
102 inflammatory responses. To determine whether PTX3 contributes to disease  
103 pathogenesis in CL, a disease characterized by cutaneous inflammation, we first  
104 determined changes in the levels of PTX3 expression during active infections in humans  
105 and mice. RT-PCR analysis showed that the expression of PTX3 mRNA was  
106 significantly (15-fold,  $p < 0.01$ ) higher in skin lesion biopsies from *L. braziliensis*-infected  
107 patients compared to healthy controls (Fig 1A) and correlates with disease severity such  
108 that the levels were highest in individual with disseminated cutaneous leishmaniasis  
109 (DCL), the most severe form of the disease (Supplementary Fig 1A). Likewise, the  
110 expression of PTX3 mRNA (Fig 1B) and protein (Figs 1C and D) was higher at the site of  
111 *L. major* (which also causes CL akin to *L. braziliensis*), infection in mice compared to  
112 uninfected sites and the expression was mostly restricted to CD68<sup>+</sup> cells (Fig 1D).

113 The increased expression of PTX3 at lesion sites during *Leishmania* infection  
114 suggests that it could mediate either host susceptibility or resistance. To determine this,  
115 we compared the outcome of *L. major* infection in wild type (WT) and PTX3 deficient  
116 (PTX3<sup>-/-</sup>) mice. At different times after infection, PTX3<sup>-/-</sup> mice had significantly ( $p < 0.01$ -  
117 0.0001) smaller lesion size compared to their WT counterparts (Fig 1E). This smaller  
118 lesion size corresponded with significantly ( $p < 0.01$ -0.0001) lower parasite burden in  
119 PTX3<sup>-/-</sup> mice at 3, 5 and 10 weeks post-infection compared to their WT counterpart mice  
120 (Fig 1F). These results indicate that PTX3 negatively regulate disease pathogenesis and  
121 possibly immunity during CL.

122

123 **Enhanced resistance in PTX3 deficient mice is associated with increased IL-17A**  
124 **production.**

125 Next, we assessed cytokine production in the spleen and lymph nodes draining (dLN)  
126 the infection site, since resistance to CL is usually associated with robust IFN- $\gamma$  and  
127 reduced IL-10 production by CD4<sup>+</sup> T cells. Surprisingly, we observed comparable  
128 frequencies of IFN- $\gamma$ <sup>+</sup>CD4<sup>+</sup> T cells (Fig 1G, Supplementary Fig 2) and IL-10<sup>+</sup>CD4<sup>+</sup> T cells  
129 (Supplementary Fig 3) in both the spleen and dLNs from infected WT and PTX3<sup>-/-</sup> mice  
130 when assessed directly *ex vivo*. Interestingly, we found that PTX3<sup>-/-</sup> mice had  
131 significantly ( $p < 0.05$ ) higher frequencies of IL-17A<sup>+</sup>CD4<sup>+</sup> T cells at 3, 5 and 10 weeks  
132 post-infection compared to their WT counterparts (Fig 1H). This was consistent with  
133 significantly elevated levels of IL-17A (Fig 1J) in the culture supernatant fluids of  
134 soluble *Leishmania* antigen (SLA)-stimulated splenocytes isolated from PTX3<sup>-/-</sup> mice. In  
135 contrast and consistent with the flow cytometry data, the levels of IFN- $\gamma$  (Fig 1I) and IL-  
136 10 (Supplementary Fig 3) in the culture supernatant fluids were comparable between  
137 WT and PTX3<sup>-/-</sup> mice. Collectively, these results indicated that the enhanced resistance  
138 to *L. major* infection in PTX3<sup>-/-</sup> mice was not due to enhanced Th1 response, but rather  
139 due to stronger Th17 responses in the absence of PTX3 signaling.

140

141 **PTX3 deficiency enhances Th17 but does not affect Th1 polarization *in vitro*.**

142 Given that we found enhanced IL-17 production following infection of PTX3<sup>-/-</sup> mice and  
143 virtually undetectable levels of IL-17 mRNA in skin biopsies from severe DCL patients  
144 (Supplementary Fig 1B), we speculated that PTX3 might negatively regulate Th17  
145 response. To test this, we performed *in vitro* Th17 and Th1 polarization studies using  
146 splenocytes obtained from WT and PTX3<sup>-/-</sup> mice. Data presented in Figs 2A & C show  
147 significantly ( $p < 0.03$ ) higher frequencies of CFSE<sup>lo</sup>CD4<sup>+</sup>IL-17A<sup>+</sup> T cells in PTX3<sup>-/-</sup>

148 splenocytes compared to their WT counterparts. In contrast and consistent with our  
149 mouse infection studies, the frequency of CFSE<sup>lo</sup> CD4<sup>+</sup>IFN- $\gamma$ <sup>+</sup> T cells in both WT and  
150 PTX3<sup>-/-</sup> splenocytes under Th1 polarizing conditions were comparable (Figs 2B and E).  
151 We confirmed these findings by ELISA, which showed higher levels of IL-17A in cell  
152 culture supernatants of PTX3<sup>-/-</sup> splenocytes under Th17 polarization condition (Fig 2D)  
153 but comparable levels of IFN- $\gamma$  in both WT and PTX3<sup>-/-</sup> splenocytes under Th1  
154 polarization condition (Fig 2E). We also observed similar increased frequencies of Th17  
155 cells using purified CD4<sup>+</sup> T cells from PTX3<sup>-/-</sup> spleens under Th17 polarizing conditions  
156 (Supplementary Fig 4). These results show that deficiency of PTX3 potentiates Th17  
157 differentiation and IL-17A production.

158         The preceding findings suggest that PTX3 may be a negative regulator of Th17  
159 response. To directly test this, we added recombinant PTX3 (rPTX3) to cultures of WT  
160 and PTX3<sup>-/-</sup> splenocytes under Th17 polarization condition. We observed that addition of  
161 rPTX3 significantly reduced the frequency of Th17 cells and the production of IL-17A by  
162 splenocytes (Figs 2G-I) or purified CD4<sup>+</sup> T cells (Supplementary Fig 4) from PTX3<sup>-/-</sup> mice.  
163 Collectively, these findings directly confirm that PTX3 is a negative regulator of Th17  
164 differentiation and IL-17 production by CD4<sup>+</sup> T cells.

165

#### 166 **PTX3 negatively regulates Th17 specific transcription factors.**

167 The observation that rPTX3 suppressed polarization of purified CD4<sup>+</sup> T cells from PTX3<sup>-/-</sup>  
168 mice into Th17 cells suggests that it may directly affect crucial transcription factors  
169 involved in the differentiation of CD4<sup>+</sup> T cells into Th17 cells. Therefore, we performed  
170 RT-PCR to determine mRNA levels of key Th17 transcription factors in WT and PTX3<sup>-/-</sup>  
171 splenocytes under Th17 polarizing conditions in the presence or absence of rPTX3. As  
172 expected, there was significantly increased mRNA expression of IL-17A in total



173 splenocytes (Fig 3A) or purified CD4<sup>+</sup> (Supplementary Fig 5) from PTX3<sup>-/-</sup> mice  
174 compared to those from their WT counterpart mice and this was inhibited by addition or  
175 rPTX3. Concomitantly, there was approximately 2-4-fold higher expression of ROR $\gamma$ t,  
176 STAT3, IRF4, BATF and AhR mRNA in Th17 polarized whole splenocytes (Figs 3B-F) or  
177 purified CD4<sup>+</sup> T cells (Supplementary Fig 5) from PTX3<sup>-/-</sup> mice compared to those from  
178 WT mice. Addition of rPTX3 to PTX3<sup>-/-</sup> splenocytes resulted in significant inhibition of  
179 ROR $\gamma$ t and AhR expression in comparison to untreated controls (Figs 3B & F). Similar  
180 reduction in the levels of STAT3 was also observed in rPTX3 treated PTX3<sup>-/-</sup> Th17 cells  
181 although these were not statistically significant (Figs 3C & D). Taken together, these  
182 findings show that PTX3 negatively regulates Th17 responses by downregulating the  
183 expression of Th17 specific transcription factors.

184

185 **Dendritic cells from PTX3<sup>-/-</sup> mice produce more IL-6 and contribute to increased**  
186 **Th17 responses**

187 Dendritic cells (DCs) present pathogen-derived antigenic peptides to naïve CD4<sup>+</sup> T cells  
188 to initiate antigen-specific T-helper cell activation and differentiation towards specific  
189 effector subsets (38-42). Because we found that the absence of PTX3 augmented Th17  
190 responses, we assessed whether deficiency of PTX3 affected DC responses that could  
191 favor Th17 differentiation. Splenic CD11c<sup>+</sup> cells from PTX3<sup>-/-</sup> mice produced higher  
192 amounts of IL-6 (Fig 4A) and IL-12p40 (Fig 4B) compared to those from WT mice  
193 following LPS stimulation. Similarly, the expression of IL-6 by MHC-II<sup>+</sup> CD11c<sup>+</sup> cells  
194 (Figs 4D & E) at the cutaneous site of *L. major* infection was significantly ( $p < 0.05$ )  
195 higher in infected PTX3<sup>-/-</sup> mice compared to their WT counterpart controls. These  
196 observations suggest that deficiency of PTX3 in DCs leads to enhanced levels of IL-6  
197 during *L. major* infection, which could further contribute to increased Th17 responses in

198 these mice. To confirm this, we co-cultured DCs from WT and PTX3<sup>-/-</sup> mice with  
199 *Leishmania*-PEPCK TCR-transgenic CD4<sup>+</sup> T cells (1:10) in presence of PEPCK peptide.  
200 We observed higher frequencies of CD4<sup>+</sup>IL-17A<sup>+</sup> T cells in co-cultures of PTX3<sup>-/-</sup> DCs  
201 and PEPCK TCR-transgenic CD4<sup>+</sup> T cells compared to those of WT DCs (Figs 4F and  
202 G). Collectively, these findings confirm that PTX3<sup>-/-</sup> DCs are capable of augmenting Th17  
203 responses during *L. major* infection possibly via regulating IL-6 levels.

204

205 **Enhanced IL-17A responses contribute to increased resistance of PTX3 deficient**  
206 **mice to *L. major* infection.**

207 Although some reports have suggested that IL-17 plays a pathogenic role in  
208 leishmaniasis (11-13), others showed that they play a protective role (7, 9, 10). Because  
209 we found that enhanced resistance of PTX3<sup>-/-</sup> mice to *L. major* was not associated with  
210 superior IFN- $\gamma$  response, we postulated that the enhanced resistance was mediated by  
211 increased IL-17 response. To determine this, we performed an *in vivo* neutralization of  
212 IL-17A in *L. major*-infected WT and PTX3<sup>-/-</sup> mice and monitored lesion size and parasite  
213 burden at 4 weeks post-infection. IL-17A neutralization in infected PTX3<sup>-/-</sup> mice resulted  
214 in increased lesion size (Fig 5A) and a concomitant increase in parasite burden (Fig 5B)  
215 compared with untreated PTX3<sup>-/-</sup> mice.

216 Next, we evaluated if administration of rPTX3 to WT mice could lead to increased  
217 susceptibility to *L. major* infection. We infected WT mice with *L. major* and administered  
218 rPTX3 intralesionally once a week for 3 weeks. WT mice treated with rPTX3 had  
219 increased lesion size (Fig 5C) that corresponded with significantly increased parasite  
220 burden (Fig 5D) compared to PBS treated controls. The enhanced susceptibility  
221 following rPTX3 treatment was accompanied by significant ( $p < 0.05$ ) reduction in the  
222 frequency of CD4<sup>+</sup>IL-17A<sup>+</sup> T cells in the dLNs and spleen compared to PBS treated  
223 controls (Fig 5E and Supplementary Fig 6). Consistent with previous findings (Figs 2B &

224 F), there was no difference in the frequency of CD4<sup>+</sup>IFN- $\gamma$ <sup>+</sup> T cells in dLNs and spleen of  
225 both rPTX3 and PBS treated groups (Fig 5F and Supplementary Fig 6). We confirmed  
226 the above results by ELISA, which showed increased levels of IL-17A (Fig 5G and  
227 Supplementary Fig 6) and unchanged levels of IFN- $\gamma$  (Fig 5H and Supplementary Fig 6)  
228 in cell culture supernatant fluids of SLA-stimulated dLN and spleen cells from rPTX3-  
229 treated mice. Collectively, these findings confirm that PTX3 enhances susceptibility to *L.*  
230 *major* infection by downregulating IL-17A response.

231

### 232 **IL-17A synergizes with IFN- $\gamma$ to mediate effective parasite killing in macrophages.**

233 *Leishmania* resides inside host macrophages and their clearance requires activation of  
234 infected cells by IFN- $\gamma$  leading to the production of reactive oxygen and nitrogen  
235 intermediates (43). To fully understand how deficiency of PTX3 enhances resistance to  
236 *L. major* infection, we compared the uptake, replication and killing of parasites in  
237 macrophages, from WT and PTX3<sup>-/-</sup> mice. Both WT and PTX3<sup>-/-</sup> macrophages had  
238 similar parasite uptake as seen by equivalent numbers of amastigotes in WT and PTX3<sup>-/-</sup>  
239 cells at 6 h post-infection (Figs 6A and B). In addition, both WT and PTX3<sup>-/-</sup>  
240 macrophages had similar number of amastigotes at 24, 48 and 72 h post-infection (Figs  
241 6A and B), suggesting that deficiency of PTX3 had no effect on parasite replication in  
242 infected cells. Furthermore, both infected WT and PTX3<sup>-/-</sup> macrophages had comparable  
243 ability to kill parasites following activation with LPS or IFN- $\gamma$  (Fig 6C).

244 Because IL-17 has been proposed to enhance leishmanicidal activity (9) we  
245 examined whether the enhanced resistance to *L. major* in PTX3<sup>-/-</sup> mice was related to IL-  
246 17 augmentation of IFN- $\gamma$ -mediated *Leishmania* killing activity. We primed PTX3<sup>-/-</sup>  
247 macrophages with IL-17 (50 & 100 ng/mL) in the presence or absence of suboptimal  
248 dose of IFN- $\gamma$  (10 ng/mL) and infected them with *L. major*. Results presented as Figs 6D

249 & E show that IL-17 cooperates with suboptimal dose of IFN- $\gamma$  to mediate increased NO  
250 production and more effective parasite killing (compared to treatment with IFN- $\gamma$  or IL-17  
251 alone). Similarly, we observed increased iNOS2 mRNA expression at the site of infection  
252 in PTX3<sup>-/-</sup> mice compared to WT counterparts (Fig 6F), which confirmed our *in vitro*  
253 findings. Collectively, our results show that the enhanced resistance of PTX3<sup>-/-</sup> mice to *L.*  
254 *major* is due to enhanced IL-17A production, which synergizes with IFN- $\gamma$  to enhance NO  
255 production, leading to more effective killing of parasites in infected macrophages.  
256  
257

258 **Discussion:**

259 Herein we showed that PTX3 levels were elevated in skin lesions from patients and mice  
260 suffering from CL, suggesting that this innate pattern recognition molecule may play a  
261 critical role in disease pathogenesis. Using a loss of function approach, we showed that  
262 deficiency of PTX3 resulted in enhanced resistance to *L. major*, and this was associated  
263 with increased IL-17 (but not IFN- $\gamma$ ) response. Neutralization studies showed that the  
264 enhanced resistance of PTX3<sup>-/-</sup> mice to *L. major* is due to enhanced Th17 responses in  
265 these mice. In contrast, administration of rPTX3 led to increased susceptibility to *L.*  
266 *major* which was associated with a dramatic downregulation of Th17 responses and IL-  
267 17A production by lymph node cells draining the infection site. Using an *in vitro*  
268 approach, we showed that CD4<sup>+</sup> T cells from PTX3<sup>-/-</sup> mice showed enhanced expression  
269 of Th17 transcription factors that drive Th17 differentiation. Collectively, these results  
270 show, for the first time, that PTX3 is a negative regulator of Th17 response during  
271 *Leishmania major* infection.

272 The expression of PTX3, a key molecule of the innate immune defense system,  
273 is upregulated in response to different stimuli such as inflammatory cytokines (IL-1 $\beta$ ,  
274 TNF $\alpha$ ), TLR agonists (e.g. LPS); distinct microbial associated molecular patterns (such  
275 as OmpA, lipoarabinomannans) and some pathogens (*E. coli*, *S. aureus*) (19, 44-46).  
276 Studies with PTX3<sup>-/-</sup> and PTX3-overexpressing mice have shown that PTX3 mediates  
277 protective immunity to various pathogens including influenza virus, *Aspergillus*  
278 *fumigatus*, and *Pseudomonas aeruginosa* (15, 33). While correlative studies in human  
279 leishmaniasis patients suggest that PTX3 may play a key role in disease pathogenesis,  
280 no study has directly demonstrated this and/or showed the mechanism through which  
281 this would occur. Results from our studies clearly show that *Leishmania* infection  
282 induces PTX3 expression and this blocks effective parasite control by suppressing  
283 protective Th17 and IL-17A responses.

284 IL-17A is a proinflammatory cytokine produced primarily by CD4<sup>+</sup> Th17 cells  
285 although other cell types, such as CD8<sup>+</sup> T cells,  $\gamma\delta$  T cells, invariant natural killer T  
286 (iNKT) cells and neutrophils are known to also secrete it. Binding of IL-17A to the IL-17  
287 receptor, which is expressed on many cells including macrophages, initiates a strong  
288 signaling cascade that leads to expression of inducible nitric oxide synthase, GM-CSF,  
289 proinflammatory cytokines, antimicrobial peptides and chemokines (47, 48) that are  
290 important for host protection from many pathogens such as bacteria (49), fungi (50) and  
291 trypanosomes (51). We showed that PTX3 negatively regulates IL-17A production during  
292 *L. major* infection since its deficiency led to increased frequency of IL-17A producing  
293 CD4<sup>+</sup> T cells in the dLNs and spleens of infected mice. In support of this, we found that  
294 the increased expression of PTX3 mRNA in biopsy samples from DCL patients was  
295 associated with suppression of IL-17A mRNA in these tissues. Indeed, neutralization of  
296 IL-17A abolished the enhanced resistance of infected PTX3<sup>-/-</sup> mice while rIL-17A  
297 treatment conferred enhanced resistance to WT mice as evidenced by significantly  
298 reduced lesion size and parasite burden. Furthermore, we found that IL-17A synergizes  
299 with IFN- $\gamma$  to mediate enhanced NO production and a concomitant more efficient  
300 parasite killing in infected macrophages.

301 The role of IL-17 in the pathogenesis of CL is controversial. While a report  
302 suggests that IL-17A mediates susceptibility to *L. major* infection in mice by regulating  
303 CXCL2 levels and neutrophil migration to the site of infection (12), observations in  
304 human patients suggest that its increased expression may contribute to better disease  
305 outcome. Increased IL-17A levels have been shown to correlate with better disease  
306 outcome in subclinical *L. braziliensis* patients (52). Similarly, studies have shown that IL-  
307 17A (possibly derived from Th17 cells) mediates protective immunity in patients against  
308 *L. infantum*, *L. major* and human post kala-azar dermal leishmaniasis (9, 10, 53). In line

309 with this, we found that the expression of IL-17A mRNA was highly suppressed in tissue  
310 biopsies from DCL patients. Importantly, the pathways leading to IL-17A production in  
311 infected mice and patients are not known. In the present study, we showed that PTX3 is  
312 a key molecule that regulates IL-17A response in CL. The expression of PTX3 in  
313 cutaneous lesions was directly correlated with clinical pathology of the disease such that  
314 PTX3 levels were highest in patients displaying disseminated (54, 55) and recidivous  
315 lesions (56). In contrast, PTX3 levels were inversely correlated with the level of IL-17A,  
316 such that individuals exhibiting disseminated disease had undetectable levels of IL-17  
317 mRNA in their lesions. Treatment of mice with rPTX3 resulted in enhanced susceptibility  
318 to *L. major* infection due to suppressed Th17 responses. These findings are consistent  
319 with previous studies on *Aspergillus* where rPTX3 treatment led to suppression of Th17  
320 responses (57).

321 Th17 cell differentiation is driven by TGF- $\beta$  and IL-6 (58, 59) and regulated by  
322 some key transcription factors including ROR $\gamma$ t (59), STAT3 (60), IRF4 (61), BATF (62)  
323 and AhR (63). In the presence of IL-6 and TGF- $\beta$ , the cooperative binding of BATF, IRF4  
324 and STAT3 with AhR contributes to initial chromatin accessibility and subsequent  
325 recruitment of ROR $\gamma$ t to regulate activation of Th17-relevant genes (64, 65). We  
326 observed increased expression of ROR $\gamma$ t, STAT3, IRF4, BATF and AhR in CD4<sup>+</sup> T cells  
327 from PTX3<sup>-/-</sup> under Th17 polarizing conditions which correlated with enhanced Th17 and  
328 IL-17A responses. Addition of rPTX3 significantly suppressed the expression of ROR $\gamma$ t,  
329 STAT3 and AhR, transcription factors and IL-17A production. These findings show that  
330 PTX3 is capable of downregulating these multiple transcription factors to suppress Th17  
331 response. Our findings are in line with a previous study which showed that deficiency of  
332 PTX3 led to enhanced Th17 response via upregulation of STAT3 in murine model of  
333 allergic asthma (14).

334           Although different inflammatory cytokines (including IL-1 $\beta$ , TNF $\alpha$ ), TLR agonists  
335 (e.g. LPS); PAMPS and pathogens have been shown to induce PTX3 expression in cells  
336 (19, 44-46), PTX3 induction by *Leishmania* has never been reported. We found that  
337 *Leishmania* infection induced massive expression of PTX3 by CD68<sup>+</sup> cells at the site of  
338 infection. Whether this induction is direct (via parasite-derived molecules) or indirect (via  
339 production of cytokines by infected cells) remains unknown. It is conceivable that some  
340 parasite-derived molecules such as LPG or GP63 could play a role in the induction of  
341 PTX3 following infection in order to downregulate protective Th17 response. This could  
342 be a novel evasion strategy employed by *Leishmania* to subvert the host immune  
343 response thereby favoring its survival within the infected host.

344           Taken together, the present study reveals a hitherto unknown role of PTX3 in  
345 regulating host immunity by suppressing Th17 and IL-17A responses. Following *L. major*  
346 infection, the production of PTX3 in WT mice limits protective IL-17 response by  
347 downregulating IL-6 production by DCs and activation of key transcription factors that  
348 favor Th17 activation in CD4<sup>+</sup> T cells. In absence of PTX3 (as seen in PTX3<sup>-/-</sup> mice),  
349 increased production of IL-6 and TGF- $\beta$  by infected DCs favors optimal differentiation of  
350 CD4<sup>+</sup> T cells into Th17 cells via increased expression of Th17-specific transcription  
351 factors like STAT3, AhR ROR $\gamma$ T, leading to enhanced production of IL-17A. Our studies  
352 clearly highlight the importance of Th17 and IL-17A responses in resistance to CL. The  
353 findings that treatment of WT mice with rPTX3 modulated Th17 response without  
354 affecting IFN- $\gamma$  (Th1) response allowed us to directly demonstrate the contribution of IL-  
355 17 in resistance to CL. The findings clearly establish IL-17A as a critical cytokine that  
356 contributes to optimum resistance to CL. They show that IL-17A synergizes with IFN- $\gamma$   
357 to more efficiently activate infected macrophages leading to increased production of NO



358 that mediates effective parasite killing. These findings suggest that PTX3 could be a  
359 therapeutic target for regulating immunity to CL.

360

361

362

363

364

365

366

367

368

369

370

371

372

373

374

375

376

377

378

379

380

381

382

383

384 **Materials and Methods:**

385 **Mice**

386 Heterozygous female PTX3<sup>+/+</sup> and homozygous male PTX3<sup>-/-</sup> (129SvEv/Bl/6 background)  
387 mice were bred at the University of Manitoba Central Animal Care Services breeding  
388 facility. Homozygous female PTX3<sup>-/-</sup> and their female homozygous wild type littermate  
389 mice (6-8 weeks old) were used in in the studies. Additionally, in some studies female  
390 PEPCK TCR-transgenic on a C57BL/6 genetic that recognizes *Leishmania* specific  
391 PEPCK peptide, were used.

392 **Human CL patients**

393 This study was conducted in Jequiçá, Bahia, Brazil, a well-known area of *L.*  
394 *braziliensis* transmission. Participants included 3 healthy endemic controls and 17  
395 patients with Tegumentary leishmaniasis with cutaneous lesions typical of *Leishmania*  
396 infection and a positive Montenegro skin test (Supplementary Table 1).

397 **Ethics Statement**

398 All mice were kept at the University of Manitoba Central Animal Care Services (CACS)  
399 facility in accordance to the Canadian Council for Animal Care guidelines. The University  
400 of Manitoba Animal Use Ethics Committee approved all studies involving animals,  
401 including infection, humane endpoints, euthanasia and collection of samples(Protocol  
402 Numbers 17-007, AC 11232).

403 Research on human CL patients was conducted with the approval of the Ethical  
404 Committee of Hospital Santa Izabel-Santa Casa de Misericórdia da Bahia (Salvador,  
405 Bahia, Brazil; 1.163.870) and Comissão Nacional de Ética em Pesquisa (CEP, Brazilian

406 National Ethics Committee, Brazil). Informed consent was obtained from each  
407 participant. All methods were performed in accordance with the guidelines and  
408 regulations determined by CEP.  
409 All human subjects that were part of this study were adults, and informed written consent  
410 was obtained from them.

#### 411 **Parasites and infection**

412 *L. major* parasites [MHOM/IL/80/Friedlin (FN)] were cultured at 26°C in M199 medium  
413 (HyClone, Logan, UT) supplemented with 20% heat-inactivated FBS (HyClone), 2  
414 mM L-glutamine, 100 U/mL penicillin, and 100 µg/mL streptomycin (Invitrogen Life  
415 Technologies, Burlington, Ontario, Canada). For infection, mice were injected in the right  
416 hind footpad with  $2 \times 10^6$  stationary phase promastigotes in 50 µL PBS as previously  
417 described (66). In some experiments, the mice were injected in the right ear lobe with  $2$   
418  $\times 10^6$  stationary phase promastigotes in 10 µL PBS. Lesion sizes were monitored weekly  
419 by measuring footpad swellings with digital calipers. Parasite burden in the infected  
420 footpads was determined by limiting dilution assay.

#### 421 ***In vivo* blockade of IL-17A, rPTX3 treatment and estimation of parasite burden**

422 For *in vivo* neutralization of IL-17A, WT and PTX3<sup>-/-</sup> mice were injected with anti-IL-17A  
423 (clone 17F3) mAb or control Ig (1 mg/mouse) i.p. 1 day before infection with *L. major*.  
424 Antibody treatment was continued once weekly at 0.5 mg/mouse for additional 4 weeks.  
425 The lesion thickness was monitored weekly and mice were sacrificed after 4 weeks post  
426 infection to determine parasite burden. To assess the impact of PTX3 on disease  
427 outcome, infected WT mice were either injected locally (intraleisionally) with PBS or

428 rPTX3 (0.5 mg in 50 ul PBS) thrice weekly and lesion thickness was monitored weekly.  
429 Treated mice were sacrificed at 4 weeks post-infection to determine immune response in  
430 spleens and dLNs and parasite burden in the infected footpads. Parasite burden in the  
431 infected footpads was quantified by limiting dilution analysis as previously described (67)  
432 .

### 433 ***In vitro* recall response and intracellular cytokine staining**

434 At various times post-infection, infected mice were sacrificed and the draining popliteal  
435 lymph nodes or cervical lymph nodes (ear infection) were harvested and made into  
436 single-cell suspensions. Cells were washed, resuspended at 4 million/ml in complete  
437 medium (DMEM supplemented with 10% heat-inactivated FBS, 2 mM glutamine, 100  
438 U/ml penicillin, and 100 µg/ml streptomycin), and plated at 1 ml/well in 24-well tissue  
439 culture plat (Falcon, VWR Edmonton, AB, Canada). Cells were stimulated with SLA (50  
440 µg/ml) for 72 h, and the supernatant fluids were collected and stored at -20°C until  
441 assayed for cytokines by ELISA.

### 442 **Cytokine ELISAs and NO**

443 IL-17A IFN- $\gamma$  and IL-10 concentrations in cell culture supernatant fluids were measured  
444 by sandwich ELISA using Ab pairs from BD Pharmingen or Biolegend according to  
445 manufacturer's suggested protocols. Nitrite concentrations in BMDM culture  
446 supernatants were used as a measure of NO production and quantified using the Griess  
447 assay.

### 448 **Generation of bone marrow-derived macrophages (BMDM), dendritic cells (BMDC)** 449 **and *in vitro* infections**

450 Bone marrow–derived DCs (BMDCs) and bone marrow–derived macrophages (BMDMs)  
451 were generated from naive WT and PTX3<sup>-/-</sup> mice as described previously (66). In brief,  
452 bone marrow cells were isolated from the femur and tibia of mice and differentiated into  
453 macrophages using complete medium supplemented with 30% L929 cell culture  
454 supernatant. For BMDC differentiation, the bone marrow cells were grown using  
455 complete medium supplemented with 20ng/mL GM-CSF. For infection, BMDMs were  
456 incubated with parasites for 6h at a cell/parasite ratio of 1:10 as previously described  
457 (66). In some experiments, infected cells were stimulated with IFN- $\gamma$  (100 and 10 ng/mL),  
458 IL-17A (100 and 50 ng/mL) and LPS (1  $\mu$ g/mL). At different times after infection,  
459 parasite numbers inside infected cells were determined by counting Giemsa stained  
460 cytospin preparations under light microscope at 100x (oil) objective. In addition, the  
461 culture supernatant fluids were also assessed for nitrite concentration. In some  
462 experiments, BMDCs were stimulated *in vitro* with LPS (1  $\mu$ g/mL) for 24 h, and culture  
463 supernatant fluids were assayed for TGF- $\beta$ , IL-12p40 and IL-6 by ELISA.

#### 464 **Purification of splenic CD4<sup>+</sup> T cells and CD11c<sup>+</sup> (dendritic) cells**

465 Splenic CD4<sup>+</sup> T and CD11c<sup>+</sup> cells were isolated by negative and positive selection using  
466 the StemCell CD4<sup>+</sup> T and CD11c<sup>+</sup> cells EasySep isolation kits, respectively, according to  
467 the manufacturer's suggested protocols. The purities of the different cell populations  
468 were > 94% (CD4<sup>+</sup>) and 87–93% (CD11c<sup>+</sup>).

469

#### 470 ***In vitro* Th1 and Th17 differentiation**

471 Single-cell suspensions from the spleens (whole splenocytes) or highly purified naïve  
472 CD4<sup>+</sup> (CD44<sup>-</sup>CD62<sup>+</sup>) cells from WT and KO mice were labeled with CFSE dye as  
473 previously described (68) and cultured in 96-well plates (2 × 10<sup>5</sup> per well in 200  $\mu$ L

474 aliquots) in the presence of plate-bound anti-CD3 (1  $\mu\text{g}/\text{mL}$ ) and anti-CD28 (1  $\mu\text{g}/\text{mL}$ )  
475 under varying polarizing conditions as follows: Th1, rIL-12 (20 ng/mL) and anti-IL-4 (10  
476  $\mu\text{g}/\text{mL}$ ); Th17, rTGF- $\beta$  (10 ng/mL), rIL-6 (100 ng/mL), anti-IL-4 (10  $\mu\text{g}/\text{mL}$ ), anti-IL-2 (10  
477  $\mu\text{g}/\text{mL}$ ) anti-IFN- $\gamma$  (10  $\mu\text{g}/\text{mL}$ ), and anti-IL-12 (10  $\mu\text{g}/\text{mL}$ ). All recombinant cytokines were  
478 purchased from Peprotech while endotoxin-free mAbs were purchased from BioLegend  
479 (San Diego, CA). In some experiments, rPTX3 (R&D system) was added into the cell  
480 cultures. After 5 days of culture, the cells were routinely assessed for proliferation and  
481 cytokine production by flow cytometry as described below.

482

#### 483 **BMDC-T cells Co-culture assays**

484 CFSE labeled highly purified naive CD4<sup>+</sup> T cells from PEPCK TCR transgenic mice were  
485 cultured for 4 days in 96-well plates with LPS-matured BMDCs from WT and PTX3<sup>-/-</sup>  
486 mice at 10:1 (DC to T cell ratio) in presence of PEPCK peptide (5  $\mu\text{M}$   
487 NDAFGVMPPVARLTPEQ, (69) and Th17-polarizing cocktail (as described earlier). After  
488 5 days of culture, the cells were routinely assessed for proliferation and cytokine  
489 production by flow cytometry as described below.

490

#### 491 **CFSE labeling and proliferation protocol**

492 The CFSE labeling protocol used here has been described previously (68). Briefly,  
493 single - cell suspensions from the spleens or dLNs were counted and stained with CFSE  
494 dye at 1.25  $\mu\text{M}$  at room temperature in the dark with continuous rocking. After 5 min,

495 staining was quenched with heat - inactivated FBS and the cells were washed, counted,  
496 resuspended in complete medium, and used for *in vitro* cultures.

497

#### 498 **Quantification of transcript levels by RT-PCR**

499 Total RNA was extracted from murine ear, splenocytes or purified CD4 T cells using the  
500 RNeasy Plus Micro Kit. mRNA was reverse transcribed and cDNA was amplified by RT-  
501 PCR using SYBR Green chemistry as described previously (70). Murine Primers and  
502 reaction conditions were found using the PRIMER BANK website (Massachusetts  
503 General Hospital. Primer Bank. <http://pga.mgh.harvard.edu/primerbank>). Data were  
504 normalized to the housekeeping gene  $\beta$ -actin and presented as fold induction over non-  
505 polarized splenocytes or CD4<sup>+</sup> T cells using the delta-delta CT method.

506 Cryopreserved human skin biopsies from lesions of infected or uninfected people were  
507 processed into fine powder using the traditional mortar and pestle system. Total RNA  
508 was extracted from these samples using RNeasy mini kit (Qiagen, Venlo, Netherlands)  
509 and DNA clean up was performed on-column by DNase treatment (Qiagen). mRNA was  
510 reverse transcribed and cDNA was amplified using Taqman gene expression assays  
511 (Applied Biosystems) for PTX3 (Hs00173615\_m1), IL17A (Hs00174383\_m1) and  
512 GAPDH (Hs03929097\_g1). All reactions were performed using the standard cycling  
513 conditions (Applied Biosystems, Warrington, United Kingdom). Data were normalized to  
514 the housekeeping gene GAPDH and presented as fold induction over normal skin (NS)  
515 using the delta-delta CT method.

516

#### 517 **Flow cytometry analysis:**

518 For flow cytometry analysis, splenocytes and dLN cells, were directly surface stained for  
519 CD3, CD4, MHC-II and CD11c expression. For intracellular cytokine analysis, surfaced  
520 - stained splenocytes and dLN cells were permeabilized with 0.1% saponin (Sigma -  
521 Aldrich) in staining buffer and then stained with specific fluorochrome - conjugated mAbs  
522 against IL-6, IFN- $\gamma$ , IL - 10, and IL - 17 (BioLegend). Samples were acquired on a BD  
523 FACSCantor machine and analyzed using FlowJo software (TreeStar Inc, Ashland, OR).

524

### 525 **Confocal microscopy**

526 PBS treated and *L. major* infected ear tissues from C57BL/6 mice were harvested after  
527 3 days post infection. The tissues were fixed for 1h at 4 °C in 4% paraformaldehyde in  
528 PBS, and incubated at 4 °C for 1h in 10% and 20% sucrose in PBS, then in 30%  
529 sucrose overnight. Tissues were embedded in OCT compound (Fisher Scientific) and  
530 cut into 10  $\mu$ m sections using a cryostat and mounted onto microscope slides. Slides  
531 were washed, blocked with Fc blocker (Innovex), 4% mouse serum (ImmunoReagents)  
532 and 4% goat serum. The primary antibodies used were rat anti-PTX3 (Enzo Life  
533 Sciences) at a 1:400 dilution, and rabbit anti-CD68 (Abcam) at a 1:400 dilution.  
534 Secondary antibodies used were AF568-conjugated goat anti-rat (Invitrogen) at 1:1000  
535 dilution, and AF647-conjugated goat anti-rabbit (Invitrogen) at 1:5000 dilution. Slides  
536 were stained with Hoechst 33342 (Molecular Probes) for 30 min at 1:2000 dilution and  
537 mounted with ProLong Gold (Invitrogen). Images were acquired using the Zeiss  
538 AxioObserver confocal microscope. Colocalization analysis (using Manders' correlation  
539 coefficient) was performed using the JACoP plugin in ImageJ.

540

### 541 **Statistics**



542 Results are shown as means  $\pm$  SE. Results from different groups were compared using  
543 Student's *t*-test or one way Anova. A *p* value of  $\leq 0.05$  was considered significant.

544

545 **Acknowledgments:**

546 We thank members of Uzonna lab for their insightful comments.

547

548

549

550

551

552

553

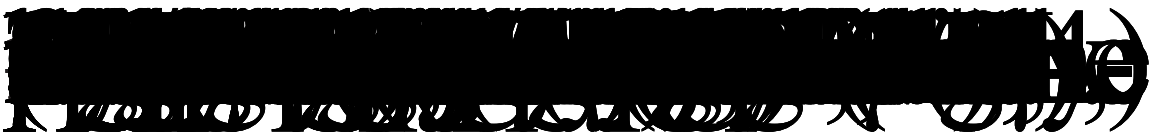

769

770

771

772

773

774

775

776

777

778

779

780

781

782

783

784

785

786

787

788

789 **References:**

790 1. Alvar J, Vélez ID, Bern C, Herrero M, Desjeux P, Cano J, et al. Leishmaniasis

791 worldwide and global estimates of its incidence. PLoS One. 2012;7(5):e35671.

792 2. Reiner SL, Locksley RM. The regulation of immunity to *Leishmania major*. Annu

793 Rev Immunol. 1995;13:151-77.

794 3. Scott P. Th cell development and regulation in experimental cutaneous

795 leishmaniasis. Chem Immunol. 1996;63:98-114.

796 4. Locksley RM, Reiner SL, Hatam F, Littman DR, Killeen N. Helper T cells without

797 CD4: control of leishmaniasis in CD4-deficient mice. Science. 1993;261(5127):1448-51.

798 5. Locksley RM, Heinzl FP, Holaday BJ, Mutha SS, Reiner SL, Sadick MD.

799 Induction of Th1 and Th2 CD4+ subsets during murine *Leishmania major* infection. Res

800 Immunol. 1991;142(1):28-32.

801 6. Launois P, Maillard I, Pingel S, Swihart KG, Xénarios I, Acha-Orbea H, et al. IL-4

802 rapidly produced by V beta 4 V alpha 8 CD4+ T cells instructs Th2 development and

803 susceptibility to *Leishmania major* in BALB/c mice. Immunity. 1997;6(5):541-9.

804 7. Banerjee A, Bhattacharya P, Dagur PK, Karmakar S, Ismail N, Joshi AB, et al.

805 Live Attenuated. J Immunol. 2018;200(1):163-76.

806 8. Sheel M, Beattie L, Frame TC, de Labastida Rivera F, Faleiro RJ, Bunn PT, et al.

807 IL-17A-Producing  $\gamma\delta$  T Cells Suppress Early Control of Parasite Growth by Monocytes in

808 the Liver. J Immunol. 2015;195(12):5707-17.

- 809 9. Nascimento MS, Carregaro V, Lima-Júnior DS, Costa DL, Ryffel B, Duthie MS, et  
810 al. Interleukin 17A acts synergistically with interferon  $\gamma$  to promote protection against  
811 *Leishmania infantum* infection. *J Infect Dis.* 2015;211(6):1015-26.
- 812 10. Pitta MG, Romano A, Cabantous S, Henri S, Hammad A, Kouriba B, et al. IL-17  
813 and IL-22 are associated with protection against human kala azar caused by *Leishmania*  
814 *donovani*. *J Clin Invest.* 2009;119(8):2379-87.
- 815 11. Terrazas C, Varikuti S, Kimble J, Moretti E, Boyaka PN, Satoskar AR. IL-17A  
816 promotes susceptibility during experimental visceral leishmaniasis caused by  
817 *Leishmania donovani*. *FASEB J.* 2016;30(3):1135-43.
- 818 12. Lopez Kostka S, Dinges S, Griewank K, Iwakura Y, Udey MC, von Stebut E. IL-  
819 17 promotes progression of cutaneous leishmaniasis in susceptible mice. *J Immunol.*  
820 2009;182(5):3039-46.
- 821 13. Pedraza-Zamora CP, Delgado-Domínguez J, Zamora-Chimal J, Becker I. Th17  
822 cells and neutrophils: Close collaborators in chronic *Leishmania mexicana* infections  
823 leading to disease severity. *Parasite Immunol.* 2017;39(4).
- 824 14. Balhara J, Shan L, Zhang J, Muhuri A, Halayko AJ, Almiski MS, et al. Pentraxin 3  
825 deletion aggravates allergic inflammation through a T. *J Allergy Clin Immunol.*  
826 2017;139(3):950-63.e9.
- 827 15. Garlanda C, Hirsch E, Bozza S, Salustri A, De Acetis M, Nota R, et al. Non-  
828 redundant role of the long pentraxin PTX3 in anti-fungal innate immune response.  
829 *Nature.* 2002;420(6912):182-6.
- 830 16. Ma YJ, Doni A, Hummelshøj T, Honoré C, Bastone A, Mantovani A, et al.  
831 Synergy between ficolin-2 and pentraxin 3 boosts innate immune recognition and  
832 complement deposition. *J Biol Chem.* 2009;284(41):28263-75.

- 833 17. Introna M, Alles VV, Castellano M, Picardi G, De Gioia L, Bottazzai B, et al.  
834 Cloning of mouse ptx3, a new member of the pentraxin gene family expressed at  
835 extrahepatic sites. *Blood*. 1996;87(5):1862-72.
- 836 18. Doni A, Peri G, Chieppa M, Allavena P, Pasqualini F, Vago L, et al. Production of  
837 the soluble pattern recognition receptor PTX3 by myeloid, but not plasmacytoid, dendritic  
838 cells. *Eur J Immunol*. 2003;33(10):2886-93.
- 839 19. Jaillon S, Peri G, Delneste Y, Frémaux I, Doni A, Moalli F, et al. The humoral  
840 pattern recognition receptor PTX3 is stored in neutrophil granules and localizes in  
841 extracellular traps. *J Exp Med*. 2007;204(4):793-804.
- 842 20. Deban L, Jaillon S, Garlanda C, Bottazzi B, Mantovani A. Pentraxins in innate  
843 immunity: lessons from PTX3. *Cell Tissue Res*. 2011;343(1):237-49.
- 844 21. Breviario F, d'Aniello EM, Golay J, Peri G, Bottazzi B, Bairoch A, et al.  
845 Interleukin-1-inducible genes in endothelial cells. Cloning of a new gene related to C-  
846 reactive protein and serum amyloid P component. *J Biol Chem*. 1992;267(31):22190-7.
- 847 22. Zhang J, Koussih L, Shan L, Halayko AJ, Chen BK, Gounni AS. TNF up-  
848 regulates Pentraxin3 expression in human airway smooth muscle cells via JNK and  
849 ERK1/2 MAPK pathways. *Allergy Asthma Clin Immunol*. 2015;11:37.
- 850 23. dos Santos CC, Han B, Andrade CF, Bai X, Uhlig S, Hubmayr R, et al. DNA  
851 microarray analysis of gene expression in alveolar epithelial cells in response to  
852 TNFalpha, LPS, and cyclic stretch. *Physiol Genomics*. 2004;19(3):331-42.
- 853 24. Han B, Mura M, Andrade CF, Okutani D, Lodyga M, dos Santos CC, et al.  
854 TNFalpha-induced long pentraxin PTX3 expression in human lung epithelial cells via  
855 JNK. *J Immunol*. 2005;175(12):8303-11.
- 856 25. Goodman AR, Levy DE, Reis LF, Vilcek J. Differential regulation of TSG-14  
857 expression in murine fibroblasts and peritoneal macrophages. *J Leukoc Biol*.  
858 2000;67(3):387-95.

- 859 26. Abderrahim-Ferkoune A, Bezy O, Chiellini C, Maffei M, Grimaldi P, Bonino F, et  
860 al. Characterization of the long pentraxin PTX3 as a TNFalpha-induced secreted protein  
861 of adipose cells. *J Lipid Res.* 2003;44(5):994-1000.
- 862 27. Diniz SN, Nomizo R, Cisalpino PS, Teixeira MM, Brown GD, Mantovani A, et al.  
863 PTX3 function as an opsonin for the dectin-1-dependent internalization of zymosan by  
864 macrophages. *J Leukoc Biol.* 2004;75(4):649-56.
- 865 28. Jeannin P, Bottazzi B, Sironi M, Doni A, Rusnati M, Presta M, et al. Complexity  
866 and complementarity of outer membrane protein A recognition by cellular and humoral  
867 innate immunity receptors. *Immunity.* 2005;22(5):551-60.
- 868 29. Moalli F, Paroni M, Véliz Rodriguez T, Riva F, Polentarutti N, Bottazzi B, et al.  
869 The therapeutic potential of the humoral pattern recognition molecule PTX3 in chronic  
870 lung infection caused by *Pseudomonas aeruginosa*. *J Immunol.* 2011;186(9):5425-34.
- 871 30. Soares AC, Souza DG, Pinho V, Vieira AT, Nicoli JR, Cunha FQ, et al. Dual  
872 function of the long pentraxin PTX3 in resistance against pulmonary infection with  
873 *Klebsiella pneumoniae* in transgenic mice. *Microbes Infect.* 2006;8(5):1321-9.
- 874 31. Moalli F, Doni A, Deban L, Zelante T, Zagarella S, Bottazzi B, et al. Role of  
875 complement and Fc{gamma} receptors in the protective activity of the long pentraxin  
876 PTX3 against *Aspergillus fumigatus*. *Blood.* 2010;116(24):5170-80.
- 877 32. Bozza S, Bistoni F, Gaziano R, Pitzurra L, Zelante T, Bonifazi P, et al. Pentraxin  
878 3 protects from MCMV infection and reactivation through TLR sensing pathways leading  
879 to IRF3 activation. *Blood.* 2006;108(10):3387-96.
- 880 33. Reading PC, Bozza S, Gilbertson B, Tate M, Moretti S, Job ER, et al. Antiviral  
881 activity of the long chain pentraxin PTX3 against influenza viruses. *J Immunol.*  
882 2008;180(5):3391-8.

- 883 34. Souza DG, Amaral FA, Fagundes CT, Coelho FM, Arantes RM, Sousa LP, et al.  
884 The long pentraxin PTX3 is crucial for tissue inflammation after intestinal ischemia and  
885 reperfusion in mice. *Am J Pathol.* 2009;174(4):1309-18.
- 886 35. Dias AA, Goodman AR, Dos Santos JL, Gomes RN, Altmeyer A, Bozza PT, et al.  
887 TSG-14 transgenic mice have improved survival to endotoxemia and to CLP-induced  
888 sepsis. *J Leukoc Biol.* 2001;69(6):928-36.
- 889 36. Salio M, Chimenti S, De Angelis N, Molla F, Maina V, Nebuloni M, et al.  
890 Cardioprotective function of the long pentraxin PTX3 in acute myocardial infarction.  
891 *Circulation.* 2008;117(8):1055-64.
- 892 37. Doni A, Garlanda C, Mantovani A. Innate immunity, hemostasis and matrix  
893 remodeling: PTX3 as a link. *Semin Immunol.* 2016;28(6):570-7.
- 894 38. Merad M, Sathe P, Helft J, Miller J, Mortha A. The dendritic cell lineage:  
895 ontogeny and function of dendritic cells and their subsets in the steady state and the  
896 inflamed setting. *Annu Rev Immunol.* 2013;31:563-604.
- 897 39. Sia JK, Georgieva M, Rengarajan J. Innate Immune Defenses in Human  
898 Tuberculosis: An Overview of the Interactions between *Mycobacterium tuberculosis* and  
899 Innate Immune Cells. *J Immunol Res.* 2015;2015:747543.
- 900 40. Srivastava S, Ernst JD, Desvignes L. Beyond macrophages: the diversity of  
901 mononuclear cells in tuberculosis. *Immunol Rev.* 2014;262(1):179-92.
- 902 41. Okwor I, Xu G, Tang H, Liang Y, Fu YX, Uzonna JE. Deficiency of CD40 Reveals  
903 an Important Role for LIGHT in Anti-*Leishmania* Immunity. *J Immunol.* 2015;195(1):194-  
904 202.
- 905 42. Xu G, Liu D, Okwor I, Wang Y, Korner H, Kung SK, et al. LIGHT Is critical for IL-  
906 12 production by dendritic cells, optimal CD4<sup>+</sup> Th1 cell response, and resistance to  
907 *Leishmania major*. *J Immunol.* 2007;179(10):6901-9.

- 908 43. Gupta G, Oghumu S, Satoskar AR. Mechanisms of immune evasion in  
909 leishmaniasis. *Adv Appl Microbiol.* 2013;82:155-84.
- 910 44. Bottazzi B, Doni A, Garlanda C, Mantovani A. An integrated view of humoral  
911 innate immunity: pentraxins as a paradigm. *Annu Rev Immunol.* 2010;28:157-83.
- 912 45. Inforzato A, Jaillon S, Moalli F, Barbati E, Bonavita E, Bottazzi B, et al. The long  
913 pentraxin PTX3 at the crossroads between innate immunity and tissue remodelling.  
914 *Tissue Antigens.* 2011;77(4):271-82.
- 915 46. Garlanda C, Bottazzi B, Bastone A, Mantovani A. Pentraxins at the crossroads  
916 between innate immunity, inflammation, matrix deposition, and female fertility. *Annu Rev*  
917 *Immunol.* 2005;23:337-66.
- 918 47. Kolls JK, Lindén A. Interleukin-17 family members and inflammation. *Immunity.*  
919 2004;21(4):467-76.
- 920 48. Mengesha BG, Conti HR. The Role of IL-17 in Protection against Mucosal  
921 *Candida* Infections. *J Fungi (Basel).* 2017;3(4).
- 922 49. Priebe GP, Walsh RL, Cederroth TA, Kamei A, Coutinho-Sledge YS, Goldberg  
923 JB, et al. IL-17 is a critical component of vaccine-induced protection against lung  
924 infection by lipopolysaccharide-heterologous strains of *Pseudomonas aeruginosa*. *J*  
925 *Immunol.* 2008;181(7):4965-75.
- 926 50. Conti HR, Shen F, Nayyar N, Stocum E, Sun JN, Lindemann MJ, et al. Th17 cells  
927 and IL-17 receptor signaling are essential for mucosal host defense against oral  
928 candidiasis. *J Exp Med.* 2009;206(2):299-311.
- 929 51. Cai CW, Blase JR, Zhang X, Eickhoff CS, Hoft DF. Th17 Cells Are More  
930 Protective Than Th1 Cells Against the Intracellular Parasite *Trypanosoma cruzi*. *PLoS*  
931 *Pathog.* 2016;12(10):e1005902.

- 932 52. Novoa R, Bacellar O, Nascimento M, Cardoso TM, Ramasawmy R, Oliveira WN,  
933 et al. IL-17 and Regulatory Cytokines (IL-10 and IL-27) in *L. braziliensis* Infection.  
934 *Parasite Immunol.* 2011;33(2):132-6.
- 935 53. Gonzalez-Lombana C, Gimblet C, Bacellar O, Oliveira WW, Passos S, Carvalho  
936 LP, et al. IL-17 mediates immunopathology in the absence of IL-10 following *Leishmania*  
937 major infection. *PLoS Pathog.* 2013;9(3):e1003243.
- 938 54. Carvalho EM, Barral A, Costa JM, Bittencourt A, Marsden P. Clinical and  
939 immunopathological aspects of disseminated cutaneous leishmaniasis. *Acta Trop.*  
940 1994;56(4):315-25.
- 941 55. Turetz ML, Machado PR, Ko AI, Alves F, Bittencourt A, Almeida RP, et al.  
942 Disseminated leishmaniasis: a new and emerging form of leishmaniasis observed in  
943 northeastern Brazil. *J Infect Dis.* 2002;186(12):1829-34.
- 944 56. Bittencourt AL, Costa JM, Carvalho EM, Barral A. Leishmaniasis recidiva cutis in  
945 American cutaneous leishmaniasis. *Int J Dermatol.* 1993;32(11):802-5.
- 946 57. D'Angelo C, De Luca A, Zelante T, Bonifazi P, Moretti S, Giovannini G, et al.  
947 Exogenous pentraxin 3 restores antifungal resistance and restrains inflammation in  
948 murine chronic granulomatous disease. *J Immunol.* 2009;183(7):4609-18.
- 949 58. Bettelli E, Carrier Y, Gao W, Korn T, Strom TB, Oukka M, et al. Reciprocal  
950 developmental pathways for the generation of pathogenic effector TH17 and regulatory  
951 T cells. *Nature.* 2006;441(7090):235-8.
- 952 59. Ivanov II, McKenzie BS, Zhou L, Tadokoro CE, Lepelley A, Lafaille JJ, et al. The  
953 orphan nuclear receptor ROR $\gamma$  directs the differentiation program of  
954 proinflammatory IL-17+ T helper cells. *Cell.* 2006;126(6):1121-33.
- 955 60. Yang XO, Panopoulos AD, Nurieva R, Chang SH, Wang D, Watowich SS, et al.  
956 STAT3 regulates cytokine-mediated generation of inflammatory helper T cells. *J Biol*  
957 *Chem.* 2007;282(13):9358-63.



- 958 61. Brüstle A, Heink S, Huber M, Rosenplänter C, Stadelmann C, Yu P, et al. The  
959 development of inflammatory T(H)-17 cells requires interferon-regulatory factor 4. *Nat*  
960 *Immunol.* 2007;8(9):958-66.
- 961 62. Schraml BU, Hildner K, Ise W, Lee WL, Smith WA, Solomon B, et al. The AP-1  
962 transcription factor Batf controls T(H)17 differentiation. *Nature.* 2009;460(7253):405-9.
- 963 63. Quintana FJ, Basso AS, Iglesias AH, Korn T, Farez MF, Bettelli E, et al. Control  
964 of T(reg) and T(H)17 cell differentiation by the aryl hydrocarbon receptor. *Nature.*  
965 2008;453(7191):65-71.
- 966 64. Ciofani M, Madar A, Galan C, Sellars M, Mace K, Pauli F, et al. A validated  
967 regulatory network for Th17 cell specification. *Cell.* 2012;151(2):289-303.
- 968 65. Liu X, Hu H, Fan H, Zuo D, Shou Z, Liao Y, et al. The role of STAT3 and AhR in  
969 the differentiation of CD4+ T cells into Th17 and Treg cells. *Medicine (Baltimore).*  
970 2017;96(17):e6615.
- 971 66. Liu D, Zhang T, Marshall AJ, Okkenhaug K, Vanhaesebroeck B, Uzonna JE. The  
972 p110delta isoform of phosphatidylinositol 3-kinase controls susceptibility to *Leishmania*  
973 *major* by regulating expansion and tissue homing of regulatory T cells. *J Immunol.*  
974 2009;183(3):1921-33.
- 975 67. Uzonna JE, Joyce KL, Scott P. Low dose *Leishmania major* promotes a transient  
976 T helper cell type 2 response that is down-regulated by interferon gamma-producing  
977 CD8+ T cells. *J Exp Med.* 2004;199(11):1559-66.
- 978 68. Liu D, Uzonna JE. The p110 delta isoform of phosphatidylinositol 3-kinase  
979 controls the quality of secondary anti-*Leishmania* immunity by regulating expansion and  
980 effector function of memory T cell subsets. *J Immunol.* 2010;184(6):3098-105.
- 981 69. Mou Z, Li J, Boussoffara T, Kishi H, Hamana H, Ezzati P, et al. Identification of  
982 broadly conserved cross-species protective *Leishmania* antigen and its responding  
983 CD4+ T cells. *Sci Transl Med.* 2015;7(310):310ra167.

984 70. Oghumu S, Gupta G, Snider HM, Varikuti S, Terrazas CA, Papenfuss TL, et al.  
985 STAT4 is critical for immunity but not for antileishmanial activity of antimonials in  
986 experimental visceral leishmaniasis. *Eur J Immunol.* 2014;44(2):450-9.  
987

989 **Figure Legends:**

990 **Fig 1: PTX3 expression is increased in CL lesion and mediates susceptibility to *L.***

991 **major infection.** Skin biopsies from normal (n = 3) and patients with CL (n = 17) were  
992 assessed for expression of PTX3 mRNA by RT-PCR (A). Wild type (WT) C57BL/6 mice  
993 (n = 4) were infected in the ear with  $2 \times 10^6$  stationary-phase *L. major* promastigotes and  
994 after 7 days, the expression of PTX3 mRNA at the infection site was assessed by RT-  
995 PCR using PBS-treated contralateral ears as controls (B). Representative confocal  
996 micrographs of ear sections after PBS or *L. major* injection. 10  $\mu$ m sections of infected  
997 or control ears were stained for PTX3 (red) and CD68 (white) and visualized by confocal  
998 microscopy (C). Scale bar = 20  $\mu$ m. Manders' Correlation Coefficient (MCC) of PTX3  
999 signals in CD68<sup>+</sup> cells (D). WT and PTX3 deficient (PTX3<sup>-/-</sup>) mice were infected with *L.*  
1000 *major* in the right hind footpad and lesion size was measured weekly with digital calipers  
1001 (E). At the indicated times, infected mice (n = 5 mice per each time point) were  
1002 sacrificed and parasite burden in the infected footpads was determined by limiting  
1003 dilution (F). At sacrifice, single cell suspensions of the spleens from infected WT and  
1004 PTX3<sup>-/-</sup> mice were analyzed directly *ex vivo* by flow cytometry for the frequency of IFN- $\gamma$   
1005 (G) and IL-17A (H) -producing CD4<sup>+</sup> T cells. The spleen cells were also stimulated with  
1006 SLA (50  $\mu$ g/ml) for 72 h and the levels of IFN- $\gamma$  (I) and IL-17A (J) in the cell culture  
1007 supernatant fluids were determined by ELISA. Results are representative of two (B and  
1008 C) or three (D-J) independent experiments with similar results. \*,  $p < 0.05$ ; \*\*,  $p < 0.01$ ;  
1009 \*\*\*,  $p < 0.005$ ; \*\*\*\*,  $p < 0.0001$ .

1010

1011 **Fig 2: Deficiency of PTX3 enhances Th17 differentiation *in vitro*.**

1012 Splenocytes from WT and PTX3<sup>-/-</sup> mice were labeled with CFSE dye and stimulated *in*  
1013 *vitro* with soluble anti-CD3 and anti-CD28 antibodies under Th1 or Th17 polarizing

1014 conditions. After 72 h, the cells were stained for IFN- $\gamma$  and IL-17A and the frequencies of  
1015 IFN- $\gamma$ <sup>-</sup> and IL-17A-secreting CD4<sup>+</sup> T cells were determined by flow cytometry. Shown  
1016 are representative dot plots (A and B) and bar graphs (C and E) showing the percentage  
1017 of CFSE<sup>lo</sup>IL-17A<sup>+</sup> (A and C) and CFSE<sup>lo</sup>IFN- $\gamma$ <sup>+</sup> (B and E) CD4<sup>+</sup> T cells. The levels of IL-  
1018 17A (D) and IFN- $\gamma$  (F) in the culture supernatant were assayed by ELISA. CFSE labeled  
1019 splenocytes from WT and PTX3<sup>-/-</sup> mice were stimulated with soluble anti-CD3 and anti-  
1020 CD28 antibodies under Th17 polarizing conditions in presence or absence of different  
1021 concentrations of rPTX3. After 72 h, the frequency of IL-17A-secreting CD4<sup>+</sup> cells was  
1022 determined by flow cytometry. Representative dot plots (G) and bar graphs (H) show the  
1023 percentage of CFSE<sup>lo</sup>CD4<sup>+</sup>IL-17A<sup>+</sup> T cells under various conditions. The levels of IL-17A  
1024 in the culture supernatant were assayed by ELISA (I). Results are representative of  
1025 three independent experiments with similar results. \*,  $p < 0.05$ ; \*\*\*\*,  $p < 0.0001$ .

1026

1027 **Fig 3: PTX3 negatively regulates Th17-specific transcription.**

1028 Splenocytes from WT and PTX3<sup>-/-</sup> mice were stimulated with soluble anti-CD3 and anti-  
1029 CD28 antibodies under Th17 polarizing conditions in presence or absence of rPTX3  
1030 (200 ng/mL). After 72 h, total RNA was isolated and mRNA levels of IL-17A (A), ROR $\gamma$ t  
1031 (B), STAT3 (C), IRF4 (D), BATF (E) and AhR (F) were determined by RT-PCR. Results  
1032 are representative of three independent experiments with similar results. \*\*,  $p < 0.01$ ; \*\*\*,  
1033  $p < 0.005$ ; \*\*\*\*,  $p < 0.0001$

1034

1035 **Fig 4: PTX3 regulates DC IL-12 and IL-6 production and function**

1036 Highly purified splenic CD11c<sup>+</sup> cells from naïve WT and PTX3<sup>-/-</sup> mice were either  
1037 unstimulated (NoTx) or stimulated with LPS (1  $\mu$ g/mL) and after 24 h, the cell culture  
1038 supernatant fluids were collected and assayed for IL-6 (A), IL-12p40 (B) and TGF- $\beta$  (C)

1039 by sandwich ELISA. WT and PTX3<sup>-/-</sup> mice were infected with *L. major* and after 4 weeks,  
1040 spleen cells were assessed for the frequency of IL-6 producing MHCII<sup>+</sup>CD11c<sup>+</sup> cells by  
1041 flow cytometry. Shown are representative dot plots (D) and bar graph (E) showing the  
1042 percentage of MHCII<sup>+</sup>CD11c<sup>+</sup>IL-6<sup>+</sup> cells. Bone marrow-derived DCs (BMDCs) from WT  
1043 and PTX3<sup>-/-</sup> were co-cultured with CFSE labeled PEPCK-specific TCR Tg CD4<sup>+</sup> T cells at  
1044 1:10 ratio in presence of PEPCK peptide. After 72 h, the frequency of CD4<sup>+</sup>IL-17A<sup>+</sup> T  
1045 cells was determined by flow cytometry. Shown are representative dot plots (F) and bar  
1046 graph (G) showing the percentage of CFSE<sup>lo</sup>CD4<sup>+</sup>IL-17A<sup>+</sup> T cells. Results are  
1047 representative of two independent experiments with similar results. \*,  $p < 0.05$ ; \*\*\*,  $p <$   
1048 0.005.

1049

1050 **Fig 5: *In vivo* neutralization of IL-17A or rPTX3 treatment increase susceptibility to**  
1051 ***L. major* infection.**

1052 WT and PTX3<sup>-/-</sup> mice (n = 5 per group) were treated (i.p) with either control Ig or anti-IL-  
1053 17A neutralizing antibody one day before *L. major* infection and continued once weekly  
1054 for additional 4 weeks. Lesion size (A) was measured weekly and mice were sacrificed  
1055 after 4 weeks to estimate parasite burden in the infected footpads (B). Groups of WT  
1056 mice were infected with *L. major* and one day post-infection, mice were divided into two  
1057 groups (6 mice per group) and treated intralesionally with either PBS or rPTX3 (0.5  
1058 µg/mouse) 3 times weekly. Lesion size (C) was measured weekly and after 4 weeks,  
1059 mice were sacrificed and parasite burden in the infected footpads was determined by  
1060 limiting dilution (D). Cells from the dLNs were assessed directly *ex vivo* for the frequency  
1061 of IL-17- (E) and IFN- $\gamma$  (F) producing CD4<sup>+</sup> T cells by flow cytometry. Some dLN cells  
1062 were stimulated with SLA (50 µg/ml) for 72 h and the levels of IL-17A (G) and IFN- $\gamma$  (H)  
1063 in the cell culture supernatant fluids were determined by ELISA. Results are

1064 representative of two independent experiments with similar results. \*,  $p < 0.05$ ; \*\*,  $p <$   
1065  $0.01$ ; \*\*\*,  $p < 0.001$ .

1066

1067 **Fig 6: PTX3 synergizes with IFN- $\gamma$  to mediate killing of *L. major* in infected**  
1068 **macrophages.**

1069 Bone marrow-derived macrophages from WT and PTX3<sup>-/-</sup> were infected with *L. major*  
1070 and at indicated times, cytospin preparations of infected cells were stained with Wright–  
1071 Giemsa stain and the percent infection (A) and total number of parasites per 100 cells  
1072 (B) were determined by microscopy. In another independent experiment, infected bone  
1073 marrow-derived macrophages from WT and PTX3<sup>-/-</sup> were stimulated with either LPS  
1074 (1 $\mu$ g/mL), IFN- $\gamma$  (100 ng/mL) or both for 48 h and the number of parasites per 100 cells  
1075 was determined (C). Bone marrow-derived macrophages from PTX3<sup>-/-</sup> were infected with  
1076 *L. major* in presence or absence of IL-17A (50 & 100 ng/mL) or IFN- $\gamma$  (10 ng/mL) alone  
1077 or both. After 48 h, cytospin preparations were stained with Wright–Giemsa stain and the  
1078 number of parasites per 100 cells was determined by microscopy (D) and the  
1079 concentration of nitrite in the supernatant was determined (E). WT mice (n = 4) were  
1080 infected with *L. major* promastigotes and after 4 weeks, the expression of iNOS2 mRNA  
1081 at the infection site was assessed by RT-PCR using PBS-treated contralateral footpads  
1082 as controls (F). Data are shown as mean  $\pm$  SEM of four to six infection tubes per group  
1083 and are from single experiment representative of at least three independent  
1084 experiments. \*,  $p < 0.05$ ; \*\*\*\*,  $p < 0.0001$ .

1085

1086 **Fig 7: PTX3 mediated regulation of immunity to *Leishmania major***

1087 In a PTX3 competent system, *Leishmania major* infection induces the production of  
1088 PTX3 from immune cells (such as macrophages and dendritic cells). PTX3  
1089 downregulates the production of IL-6 which contributes to suppression of Th17

1090 response. In addition, PTX3 directly inhibits the expression of Th17-specific transcription  
1091 factors (including ROR $\gamma$ T, IRF-4, BATF, AhR and STAT3) further enhancing the  
1092 suppression of Th17 differentiation and IL-17A production. In the absence of PTX3 (as  
1093 seen in PTX3 deficient mice), increased expression of IL-6 and Th17-specific  
1094 transcription factors leads to increased Th17 differentiation and a concomitant increase  
1095 in the frequency of Th17 cells and increased levels of IL-17A. This enhanced IL-17A  
1096 production synergizes with IFN- $\gamma$  to more efficiently activate *Leishmania*-infected  
1097 macrophages resulting in increased nitric oxide production, enhanced parasite killing  
1098 and increased host resistance to *L. major*.

1099

1100

1101

1102

1103

1104

1105

1106

1107

1108

1109

1110

1111

1112

1113

1114

1115

1116

1117

1118

1119

1120 **Supplementary Figure Legends:**

1121 **Supplementary Fig 1: Expression of PTX3 and IL-17A in different forms of CL**

1122 Skin biopsies from normal (NS) (n = 3) and patients with different forms of CL: localized  
1123 CL (LCL, n = 6), *Leishmania* Recidiva Cutis (LRC, n = 5) and Disseminated  
1124 leishmaniasis (DCL, n = 6) were assessed for expression of PTX3 (A) and IL-17 (B)  
1125 mRNA by RT-PCR. \*,  $p < 0.05$ .

1126

1127 **Supplementary Fig 2: Absence of PTX3 enhances IL-17A but has no effect on IFN- $\gamma$**   
1128 **response in *L. major*-infected mice.**

1129 Groups of WT and PTX3<sup>-/-</sup> mice were with infected with *L. major* and at the indicated  
1130 times, infected mice (n = 5 per each time point) were sacrificed and single cell  
1131 suspension of the dLNs were analyzed directly *ex vivo* by flow cytometry for the  
1132 frequency of IL-17A (A and D) and IFN- $\gamma$  (B and E) -producing CD4<sup>+</sup> T cells. Some dLN  
1133 cells were stimulated with SLA (50  $\mu$ g/ml) for 72h and the levels of IFN- $\gamma$  (C) in the cell  
1134 culture supernatant fluids was measured by ELISA. Results are representative of three  
1135 independent experiments with similar results. \*,  $p < 0.05$ .

1136

1137 **Supplementary Fig 3: Deficiency of PTX3 has no effect on IL-10 during primary**  
1138 ***Leishmania major* infection.**

1139 Groups of WT and PTX3<sup>-/-</sup> mice were infected with *L. major* and at the indicated times, (n  
1140 = 5 per each time point), sacrificed and single cell suspension of the spleen and dLNs  
1141 analyzed directly *ex vivo* by flow cytometry for the frequency of IL-10 producing CD4<sup>+</sup> T  
1142 cells (A, B & D). Splenocytes and dLN cells were also stimulated with SLA (50  $\mu$ g/ml) for  
1143 72 h, and the levels of IL-10 (C & E) in the cell culture supernatant was measured by



1144 ELISA. Results are representative of three independent experiments with similar results.

1145 \*,  $p < 0.05$ ; \*\*,  $p < 0.01$ .

1146

1147 **Supplementary Fig 4: rPTX3 inhibits excessive Th17 differentiation by purified**  
1148 **CD4<sup>+</sup> T cells from PTX3<sup>-/-</sup> mice.**

1149 Highly purified CD4<sup>+</sup>T cells from WT and PTX3<sup>-/-</sup> mice were labeled with CFSE dye and  
1150 stimulated with soluble anti-CD3 and anti-CD28 antibodies under Th17-polarizing  
1151 conditions in the presence or absence of different concentration of rPTX3. After 72 h, the  
1152 frequency of IL-17A-secreting CD4<sup>+</sup> cells was determined by flow cytometry.  
1153 Representative dot plots (A) and bar graphs (B) showing the percentage of CFSE<sup>-</sup> IL-  
1154 17A<sup>+</sup> CD4<sup>+</sup> T cells. The levels of IL-17A in the culture supernatant fluids were assayed  
1155 by ELISA (C). Results are representative of three independent experiments with similar  
1156 results. \*,  $p < 0.05$ ; \*\*,  $p < 0.01$ ; \*\*\*\*,  $p < 0.0001$ .

1157

1158 **Supplementary Fig 5: PTX3 negatively regulates Th17-specific transcription**  
1159 **factors.** Purified CD4<sup>+</sup> T cells from WT and PTX3<sup>-/-</sup> mice were stimulated with soluble  
1160 anti-CD3 and anti-CD28 antibodies under Th17-polarizing conditions in presence or  
1161 absence of rPTX3 (200/mL). After 72h, total RNA was isolated and mRNA levels of IL-  
1162 17A (A) and ROR $\gamma$ T (B), STAT3 (C), IRF4 (D), BATF (E) and AhR (F) were determined  
1163 by RT-PCR. \*\*\*,  $p < 0.001$ ; \*\*\*\*,  $p < 0.0001$

1164

1165 **Supplementary Fig 6: rPTX3 treatment inhibits IL-17A production by spleen cells.**

1166 Groups of WT mice were with infected with *L. major* and at 24 hours post-infection, mice  
1167 were divided into two groups (6 mice per group) and treated intralesionally with either  
1168 PBS or rPTX3 (0.5  $\mu$ g/mouse) 3 times weekly. At 4 weeks post-infection, mice were

1169 sacrificed and spleen cells were isolated and assessed directly *ex vivo* for the frequency  
1170 of -17A (A) and IFN- $\gamma$  (B) -producing CD4<sup>+</sup> T cells by flow cytometry. Some spleen cells  
1171 were stimulated with SLA (50  $\mu$ g/ml) for 72 h, and the levels of IL-17A (C) and IFN- $\gamma$  (D)  
1172 in the cell culture supernatant fluids were determined by ELISA. Results are  
1173 representative of two independent experiments with similar results. \* $p < 0.05$ , \*\* $p < 0.01$ .

1174

1175 **Supplementary Table 1: Clinical characteristics of Human CL patients**

1176

1177

1178

1179

1180

1181

1182

1183

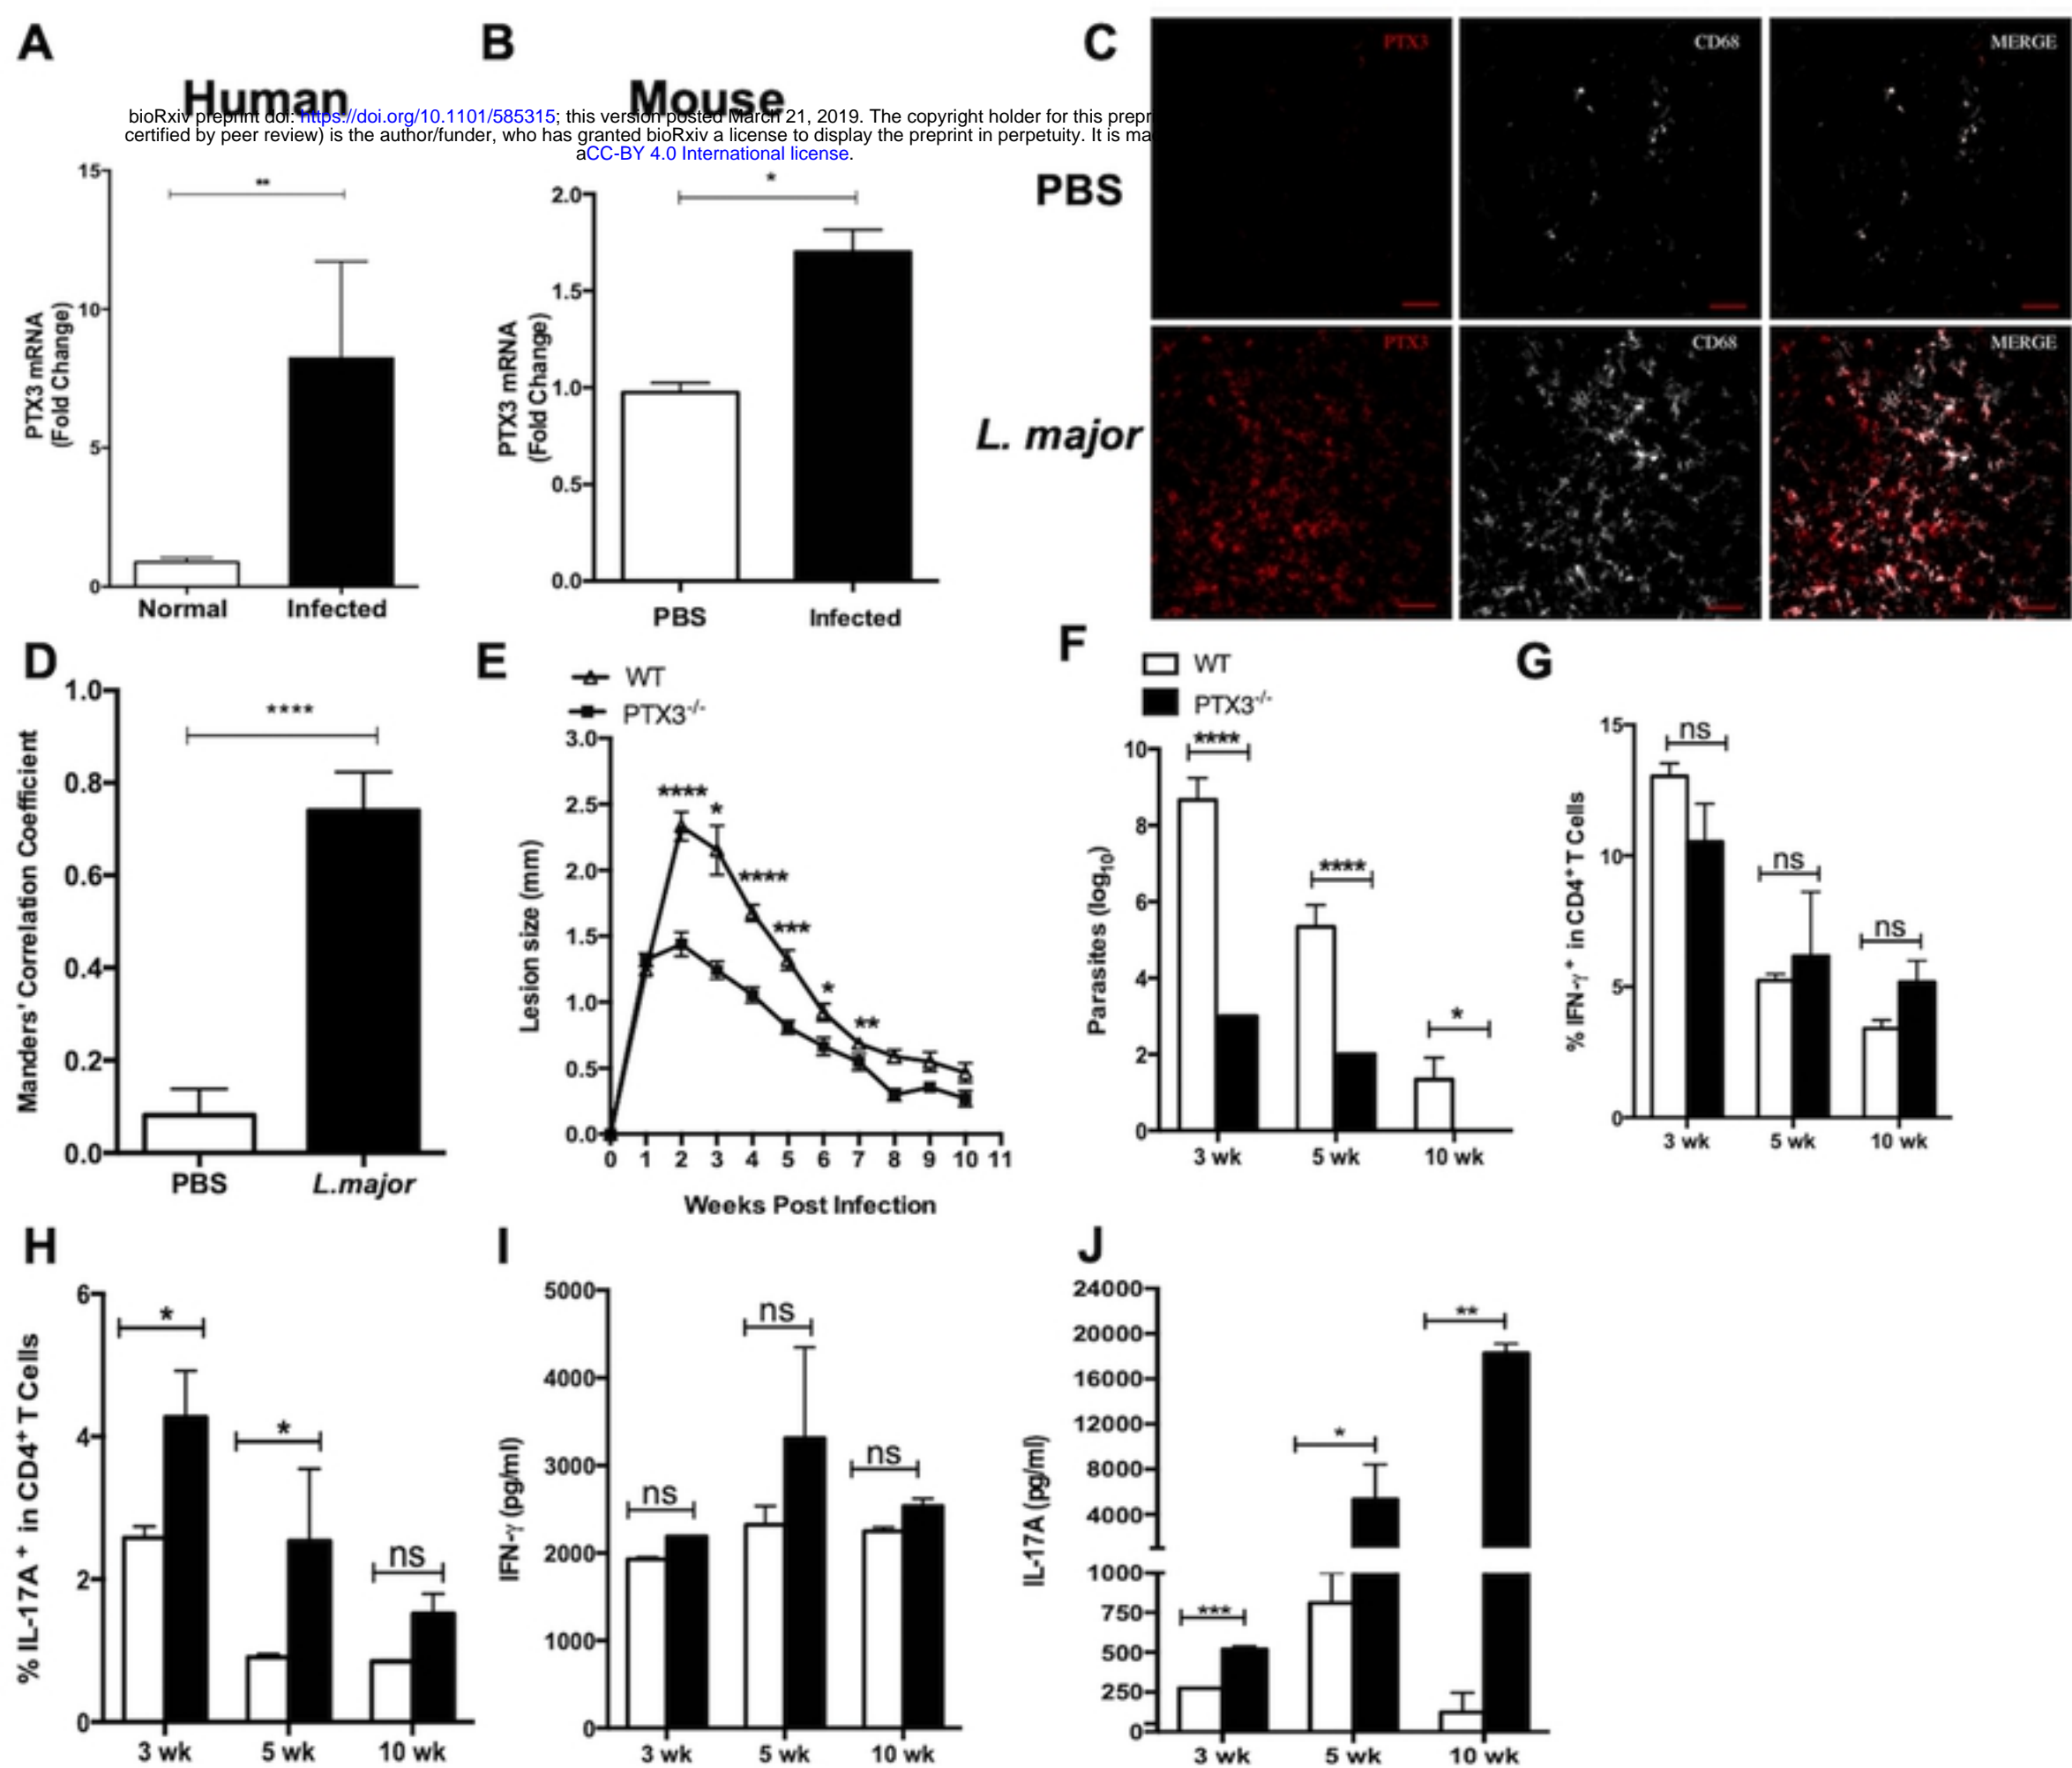

Figure 1

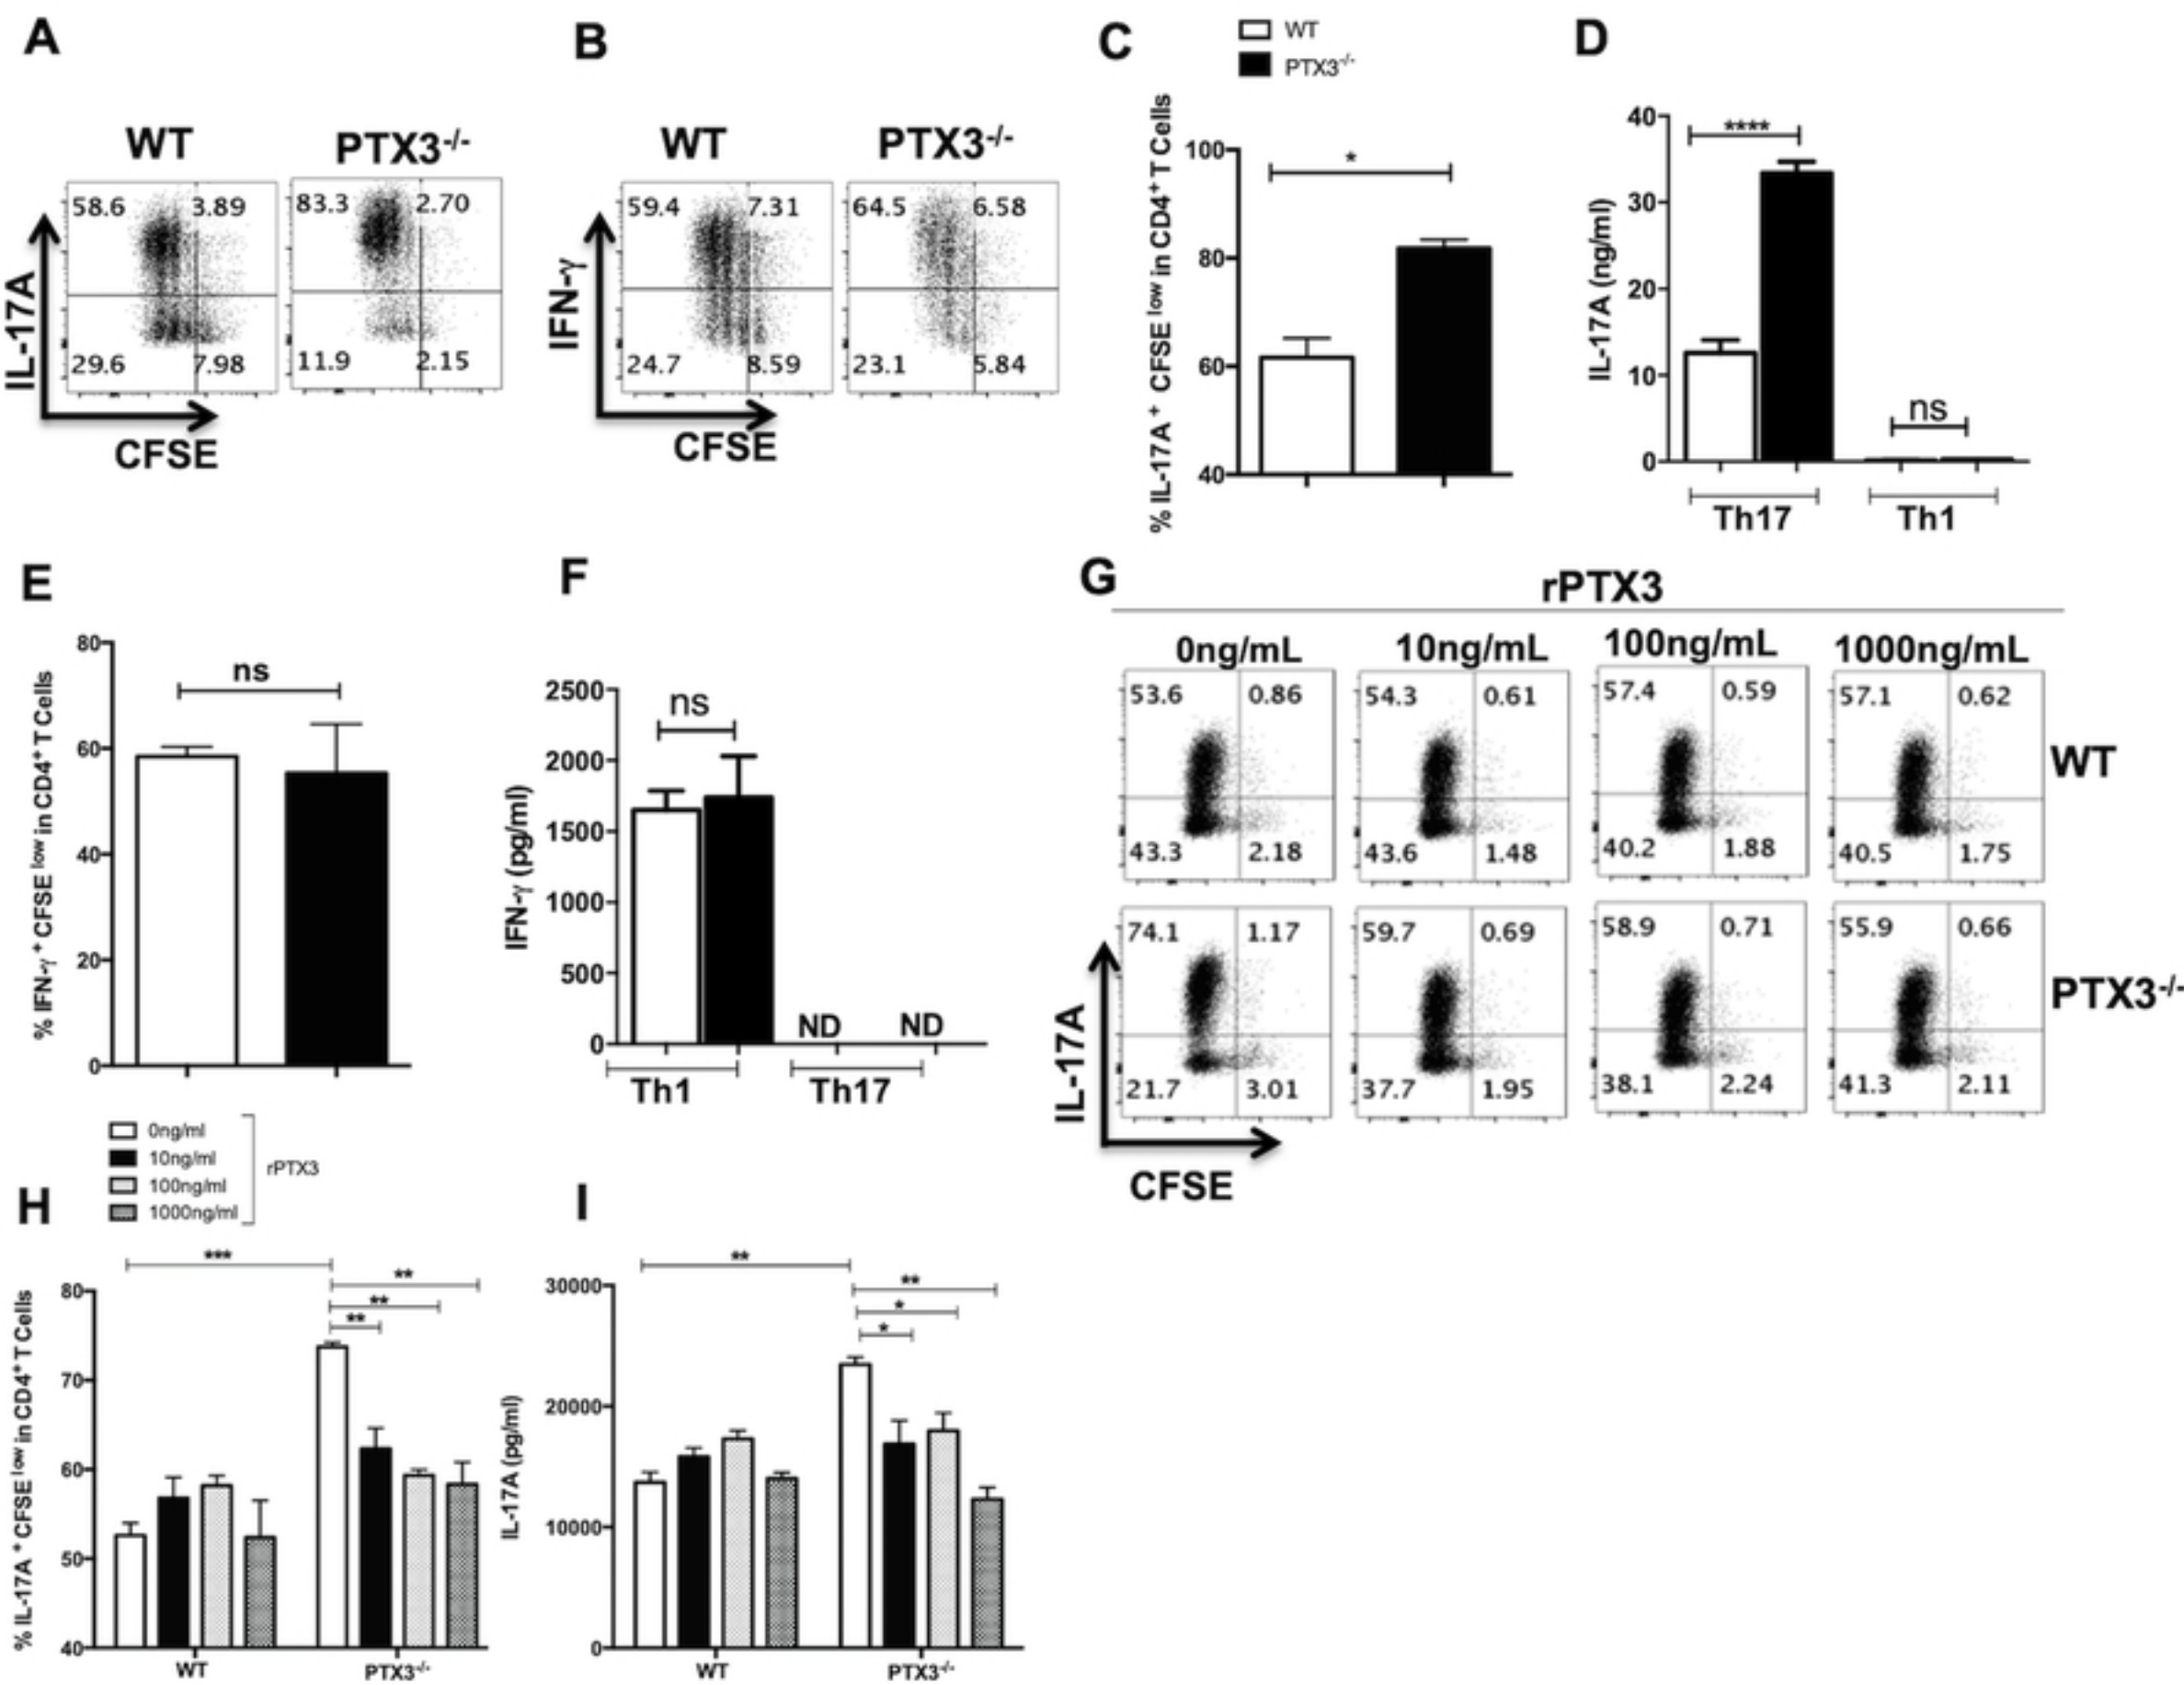

Figure 2

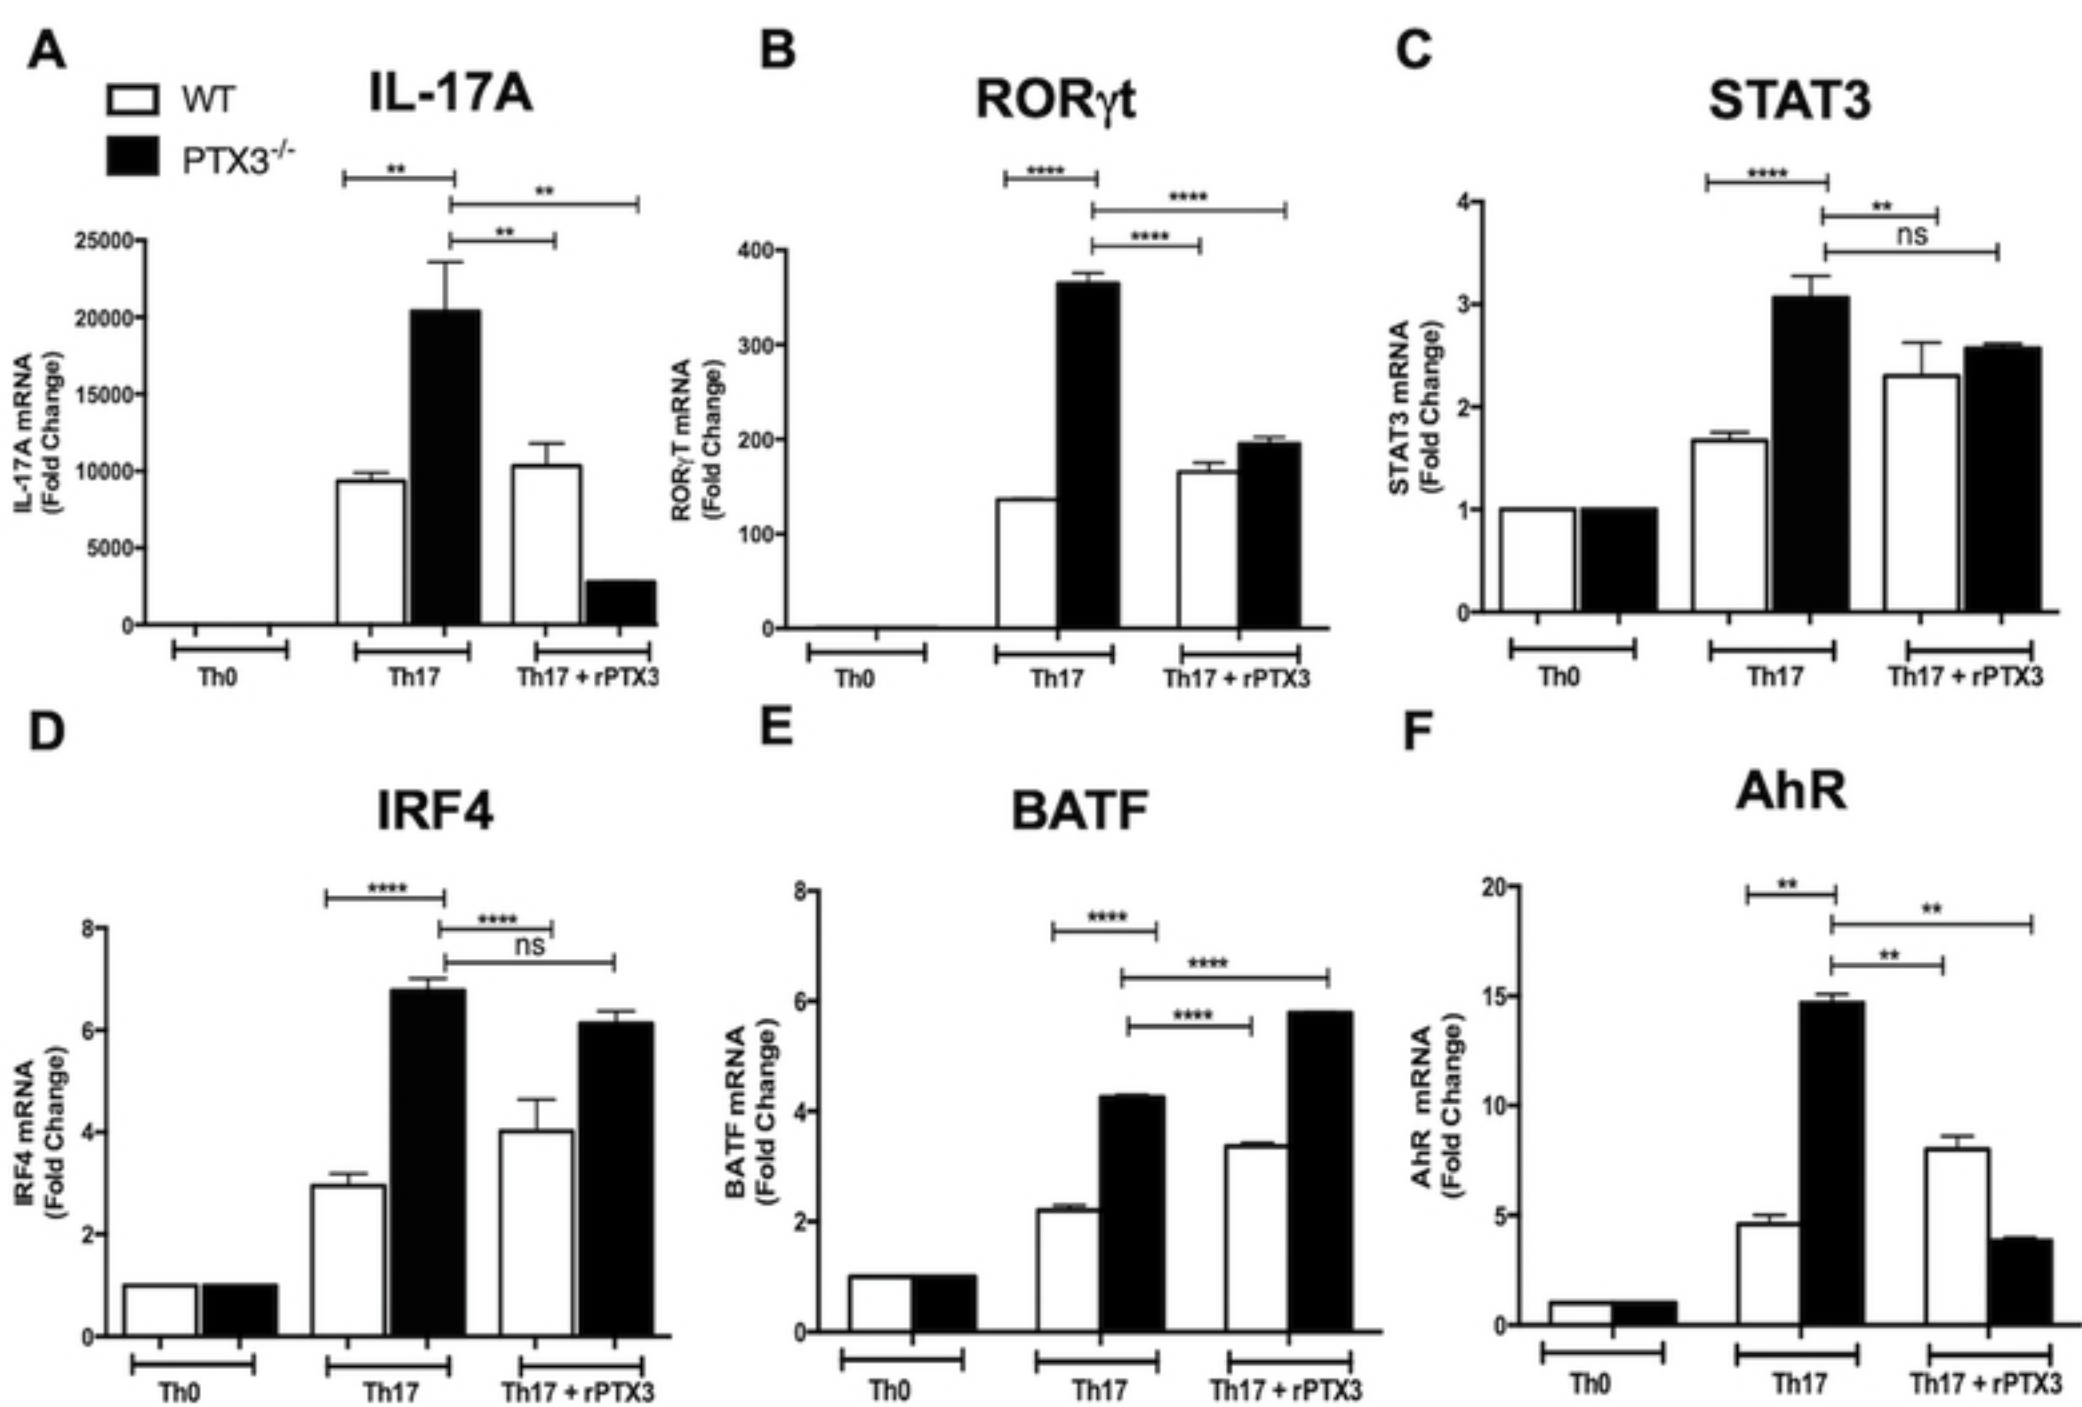

Figure 3

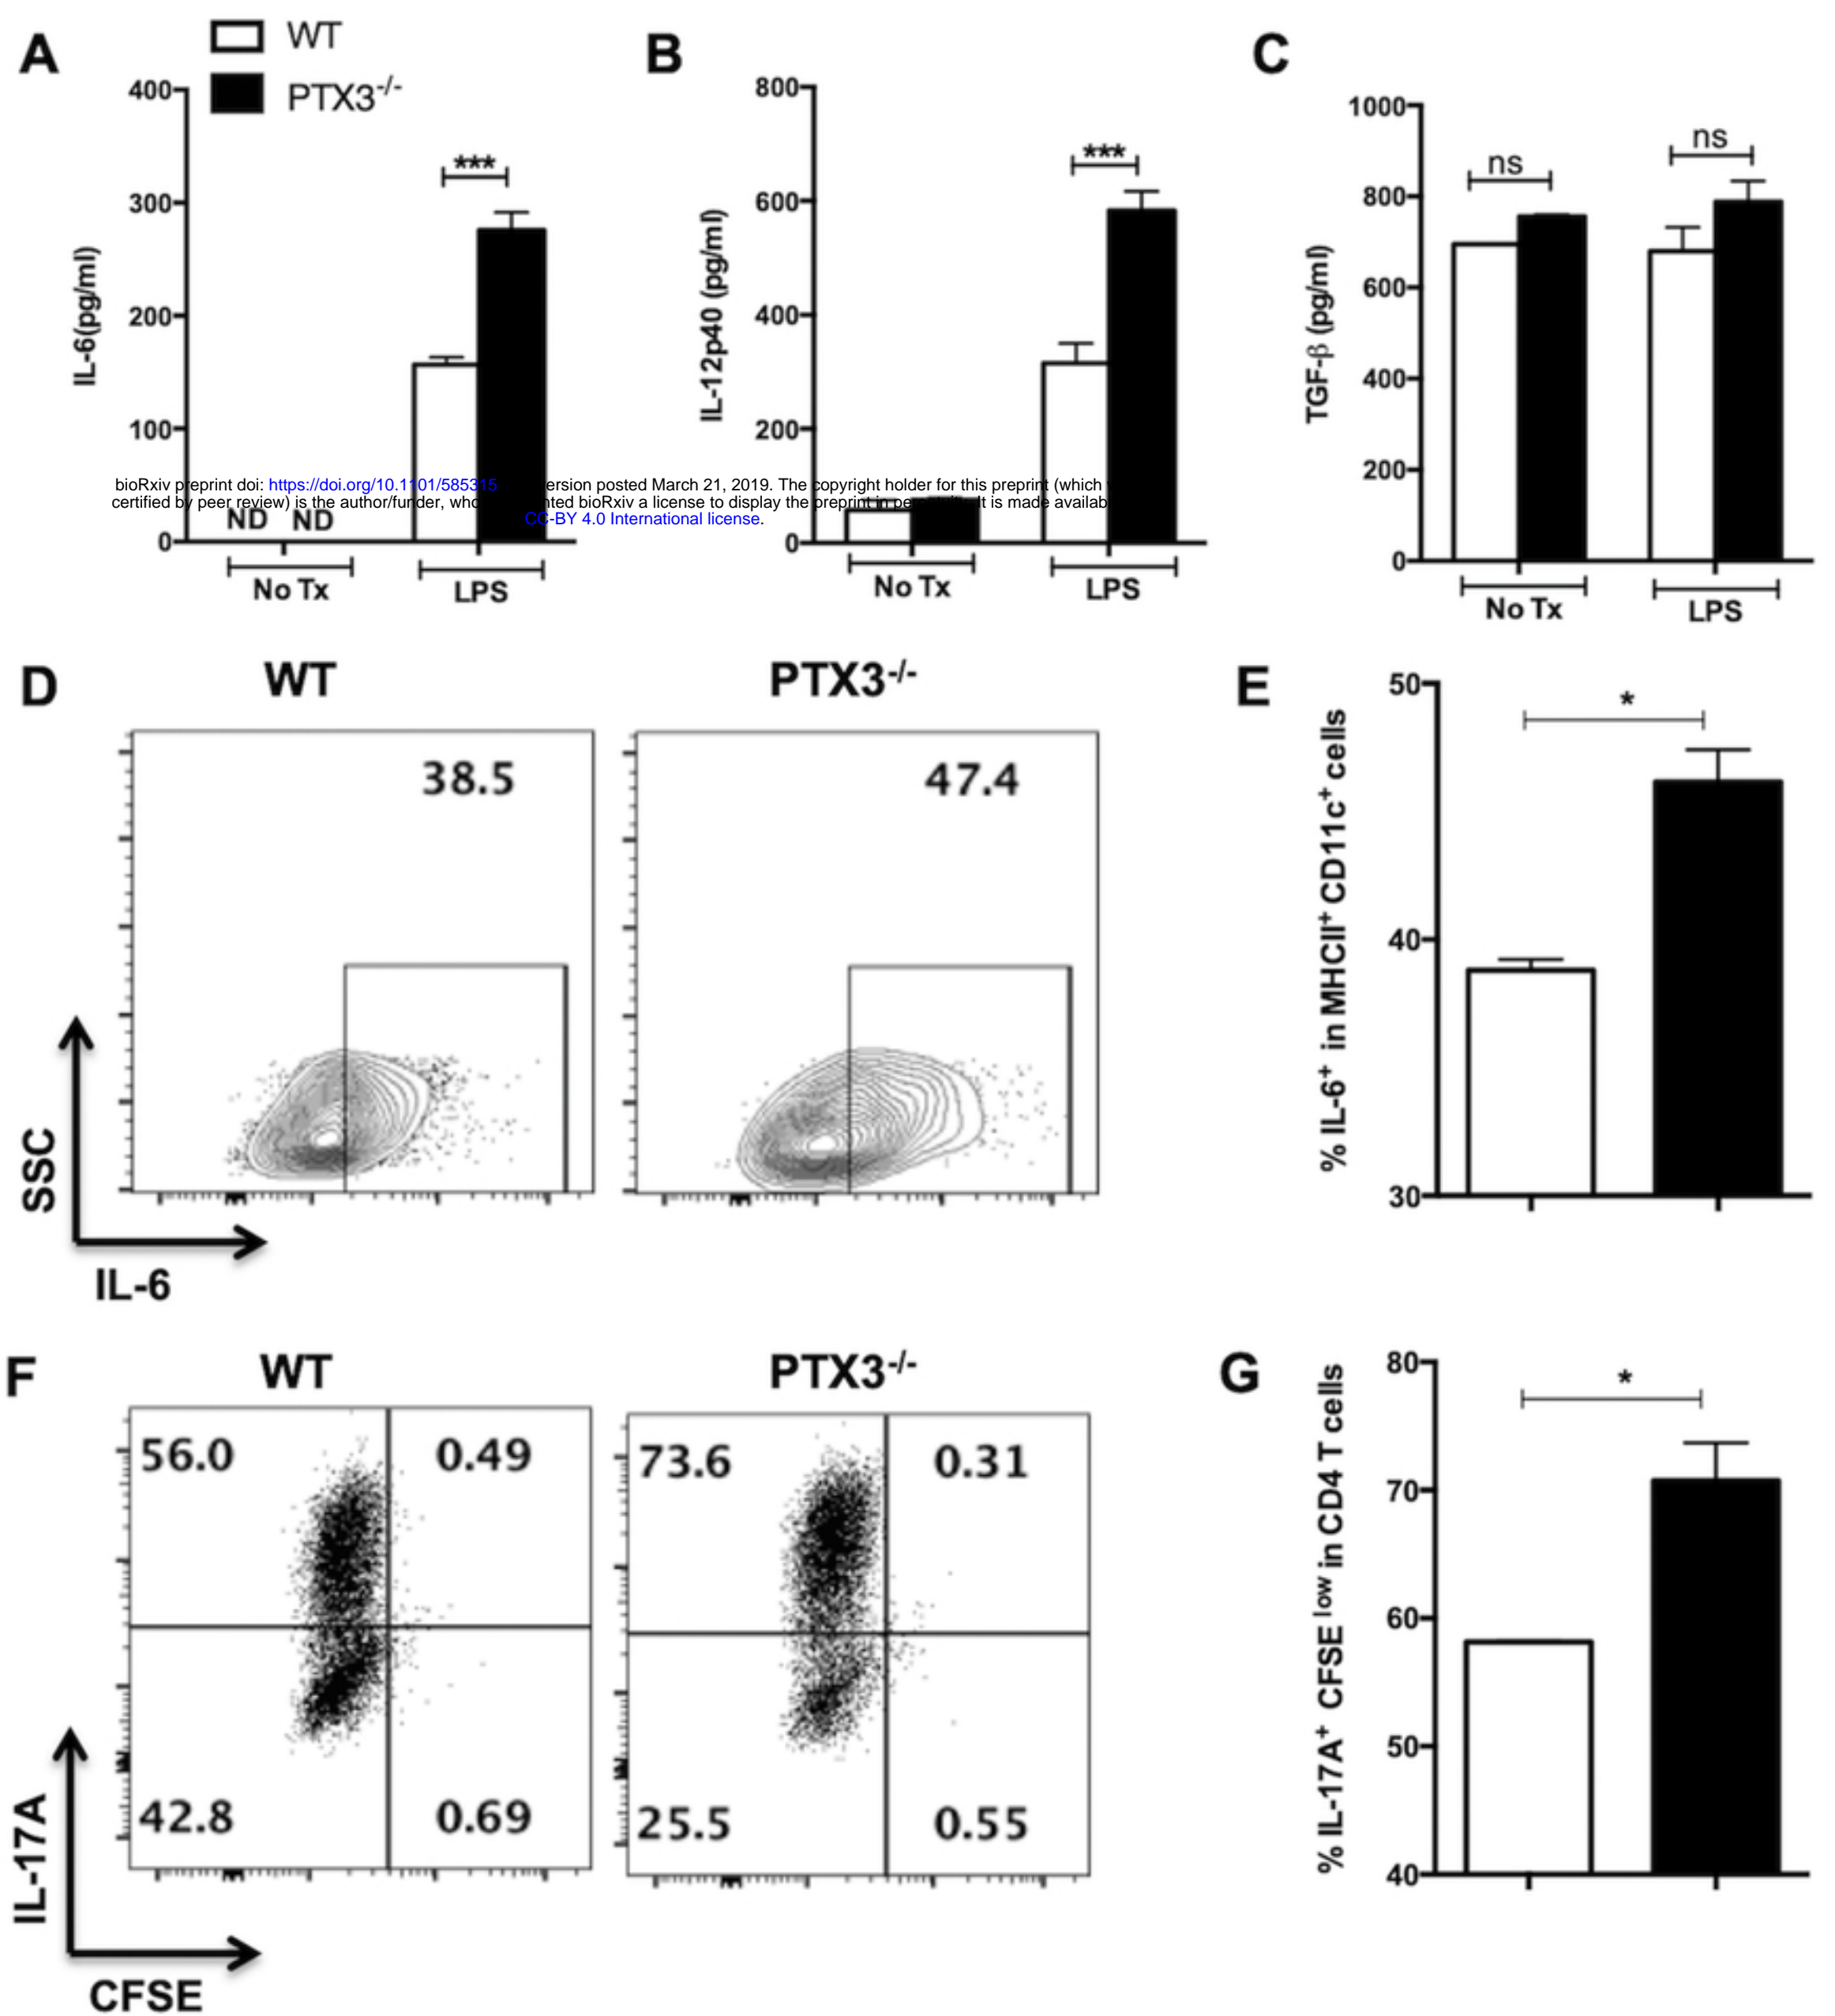

Figure 4

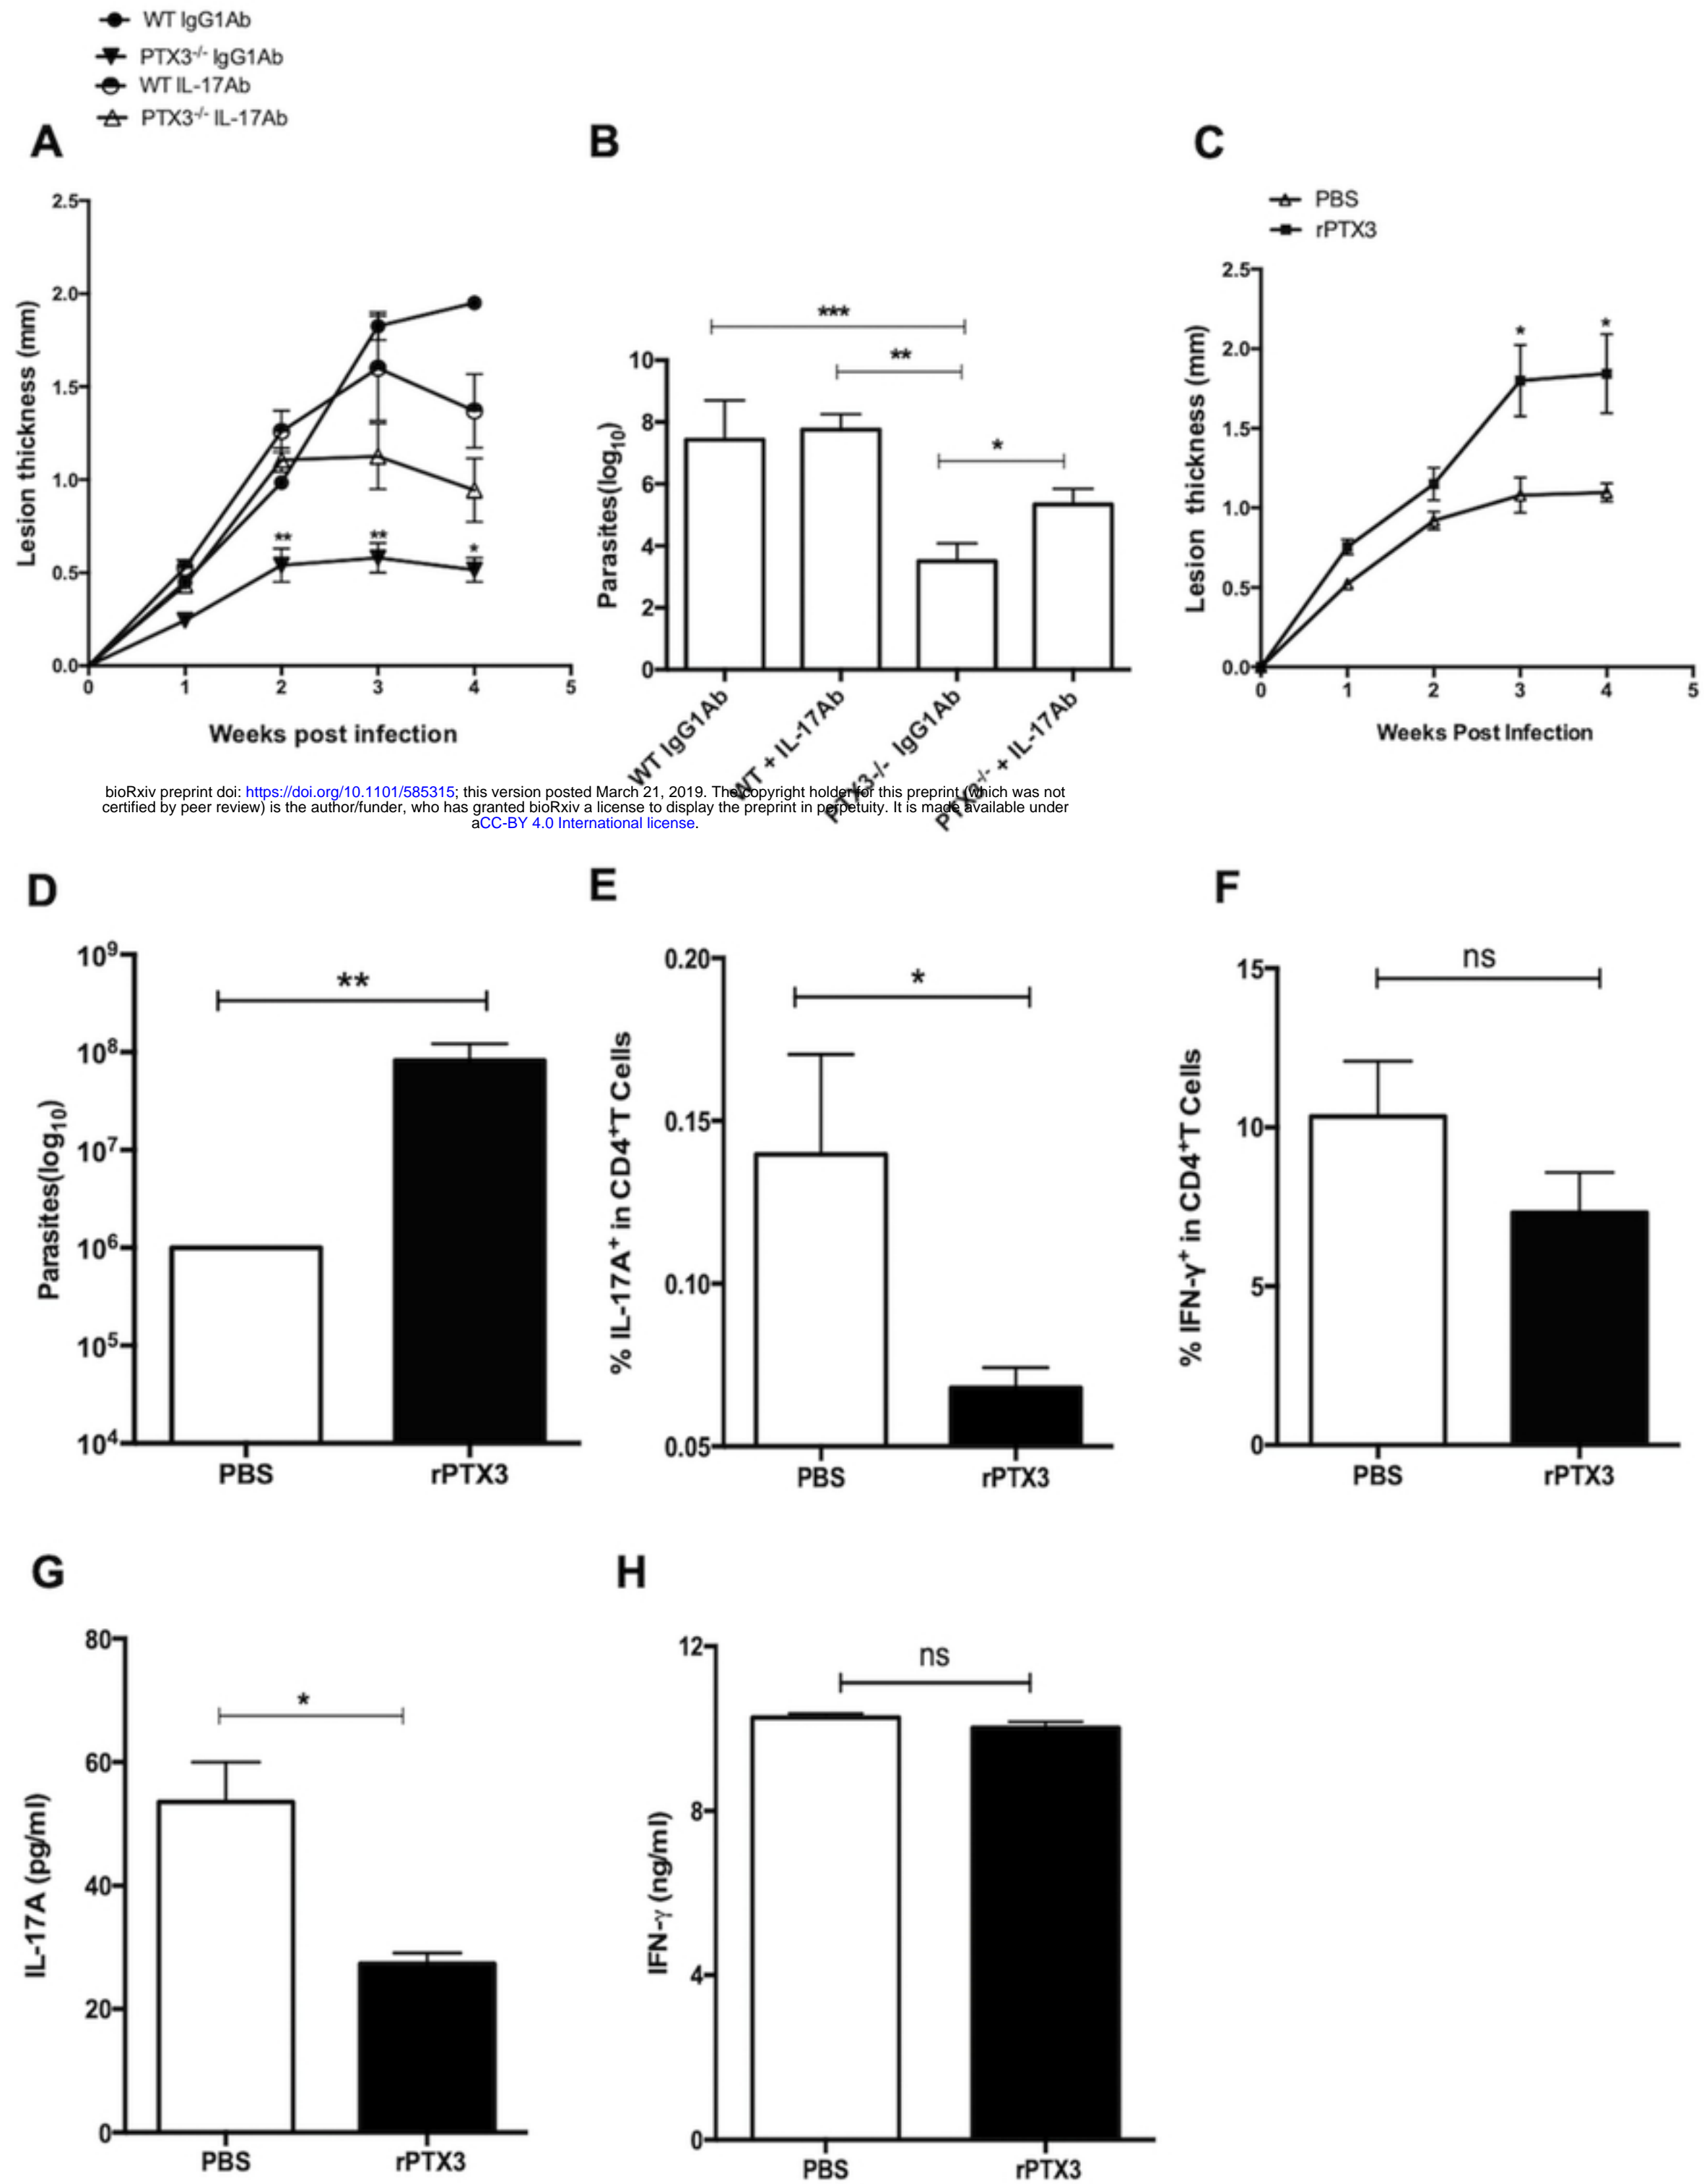

bioRxiv preprint doi: <https://doi.org/10.1101/585315>; this version posted March 21, 2019. The copyright holder for this preprint (which was not certified by peer review) is the author/funder, who has granted bioRxiv a license to display the preprint in perpetuity. It is made available under aCC-BY 4.0 International license.

Figure 5

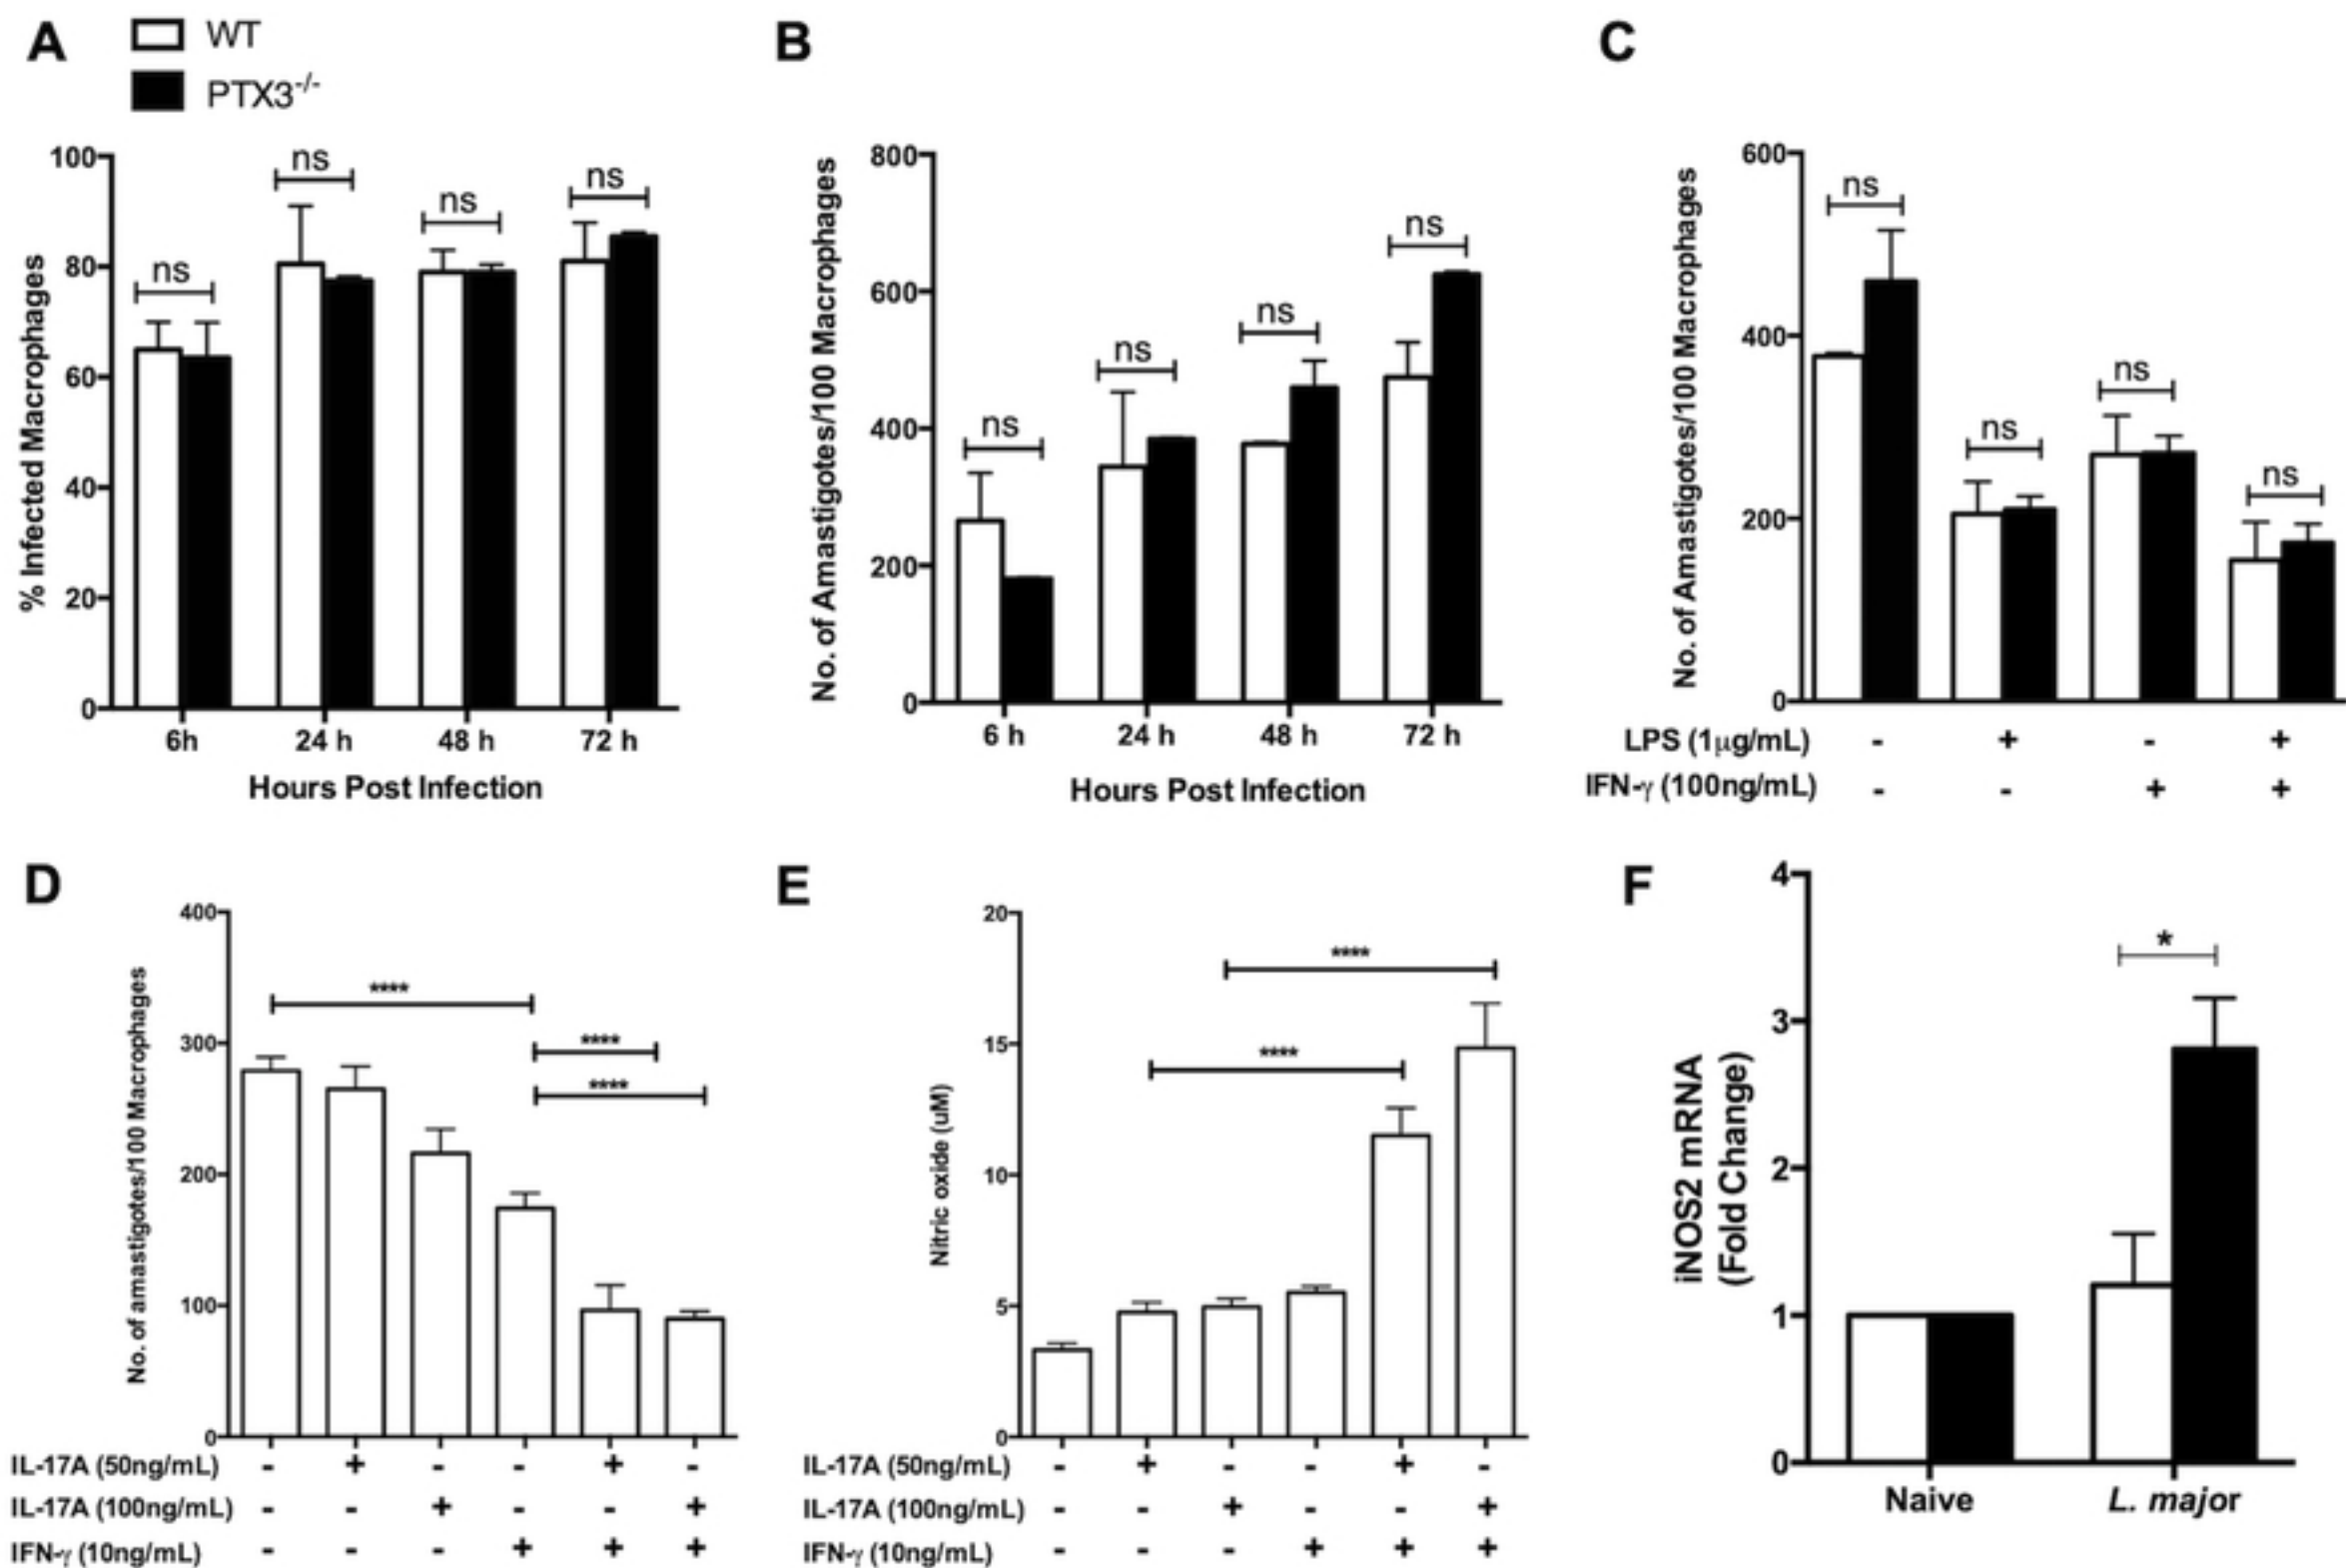

Figure 6



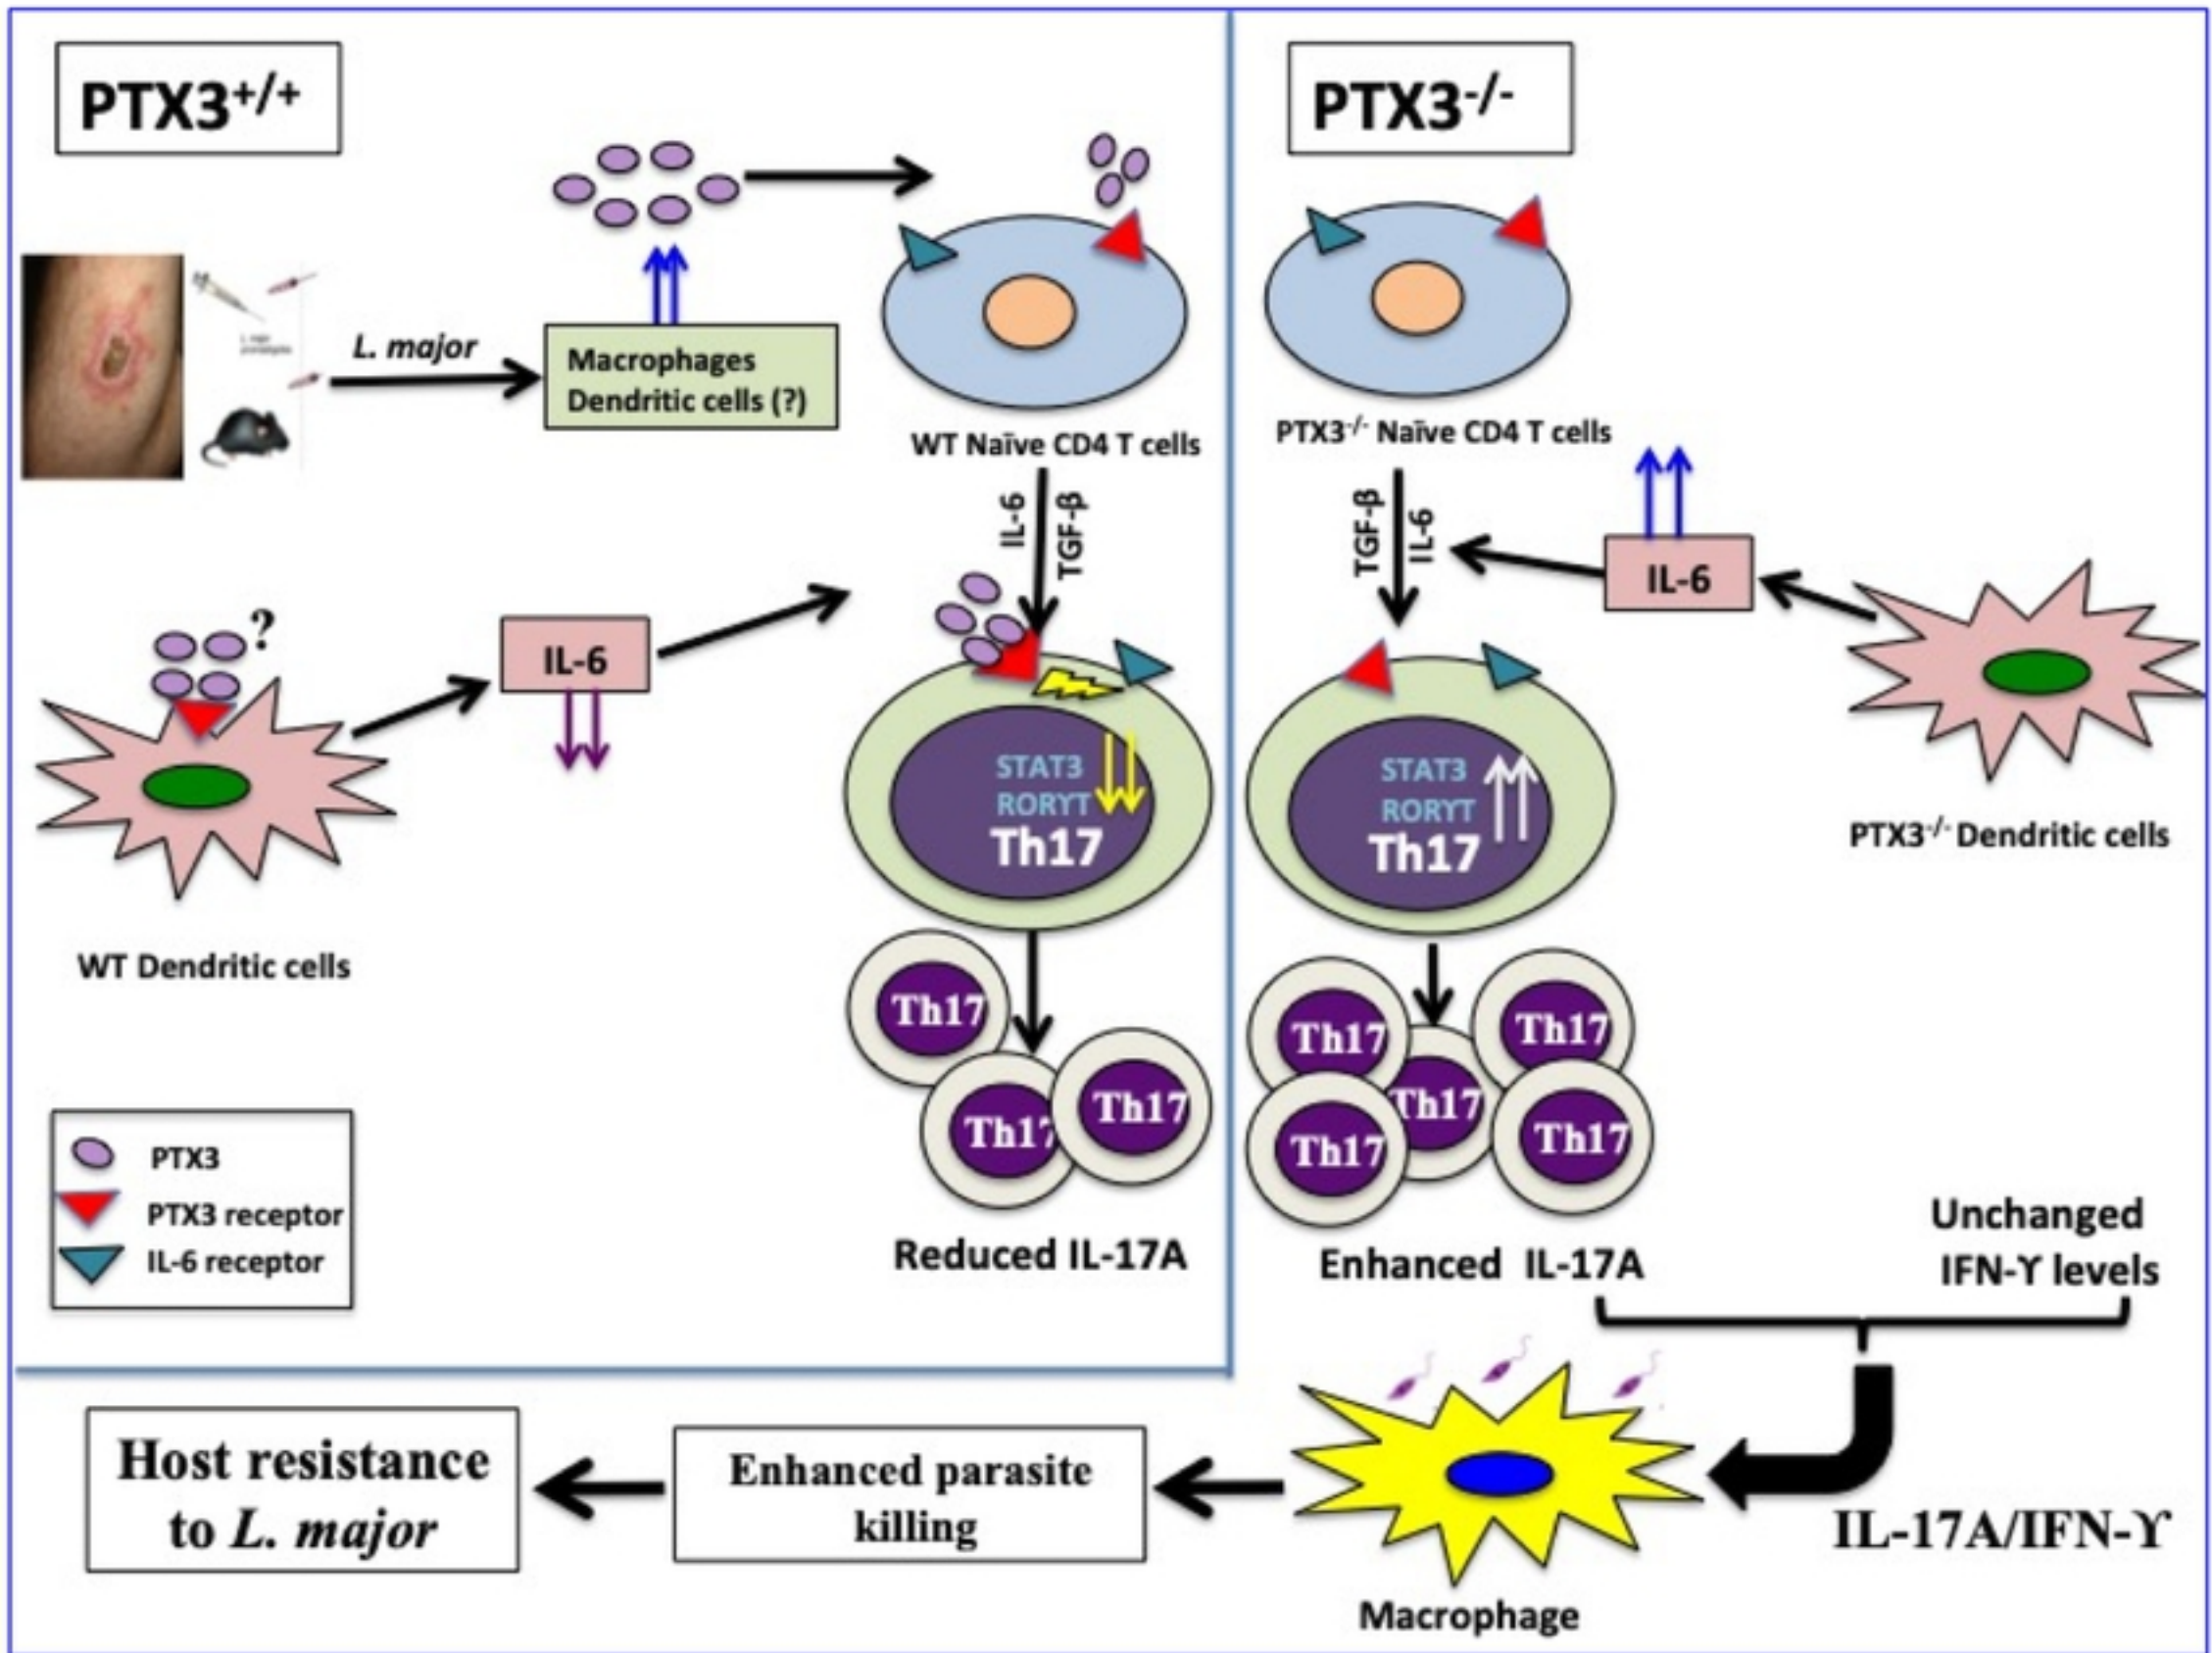

Figure 7
